# Supplementary material for: A Google Earth Engine Algorithm to Map Phenological Metrics in Mountain Areas Worldwide with Landsat Collection and Sentinel-2
Source: MDPI journal article supplement (doi:10.3390/geomatics3010012), 2023-02-21
Supplement: s1 [file s1]

### Algorithm S1

The Google Earth Engine Algorithm to map phenological metrics in mountain areas scalable worldwide with Landsat collection and Sentinel-2 has been reported here below. It is worth noting that the code is in Javascript and runnable in the main GEE console. Users are free to convert in R or Python or Julia.

```

////////////////////////////////////
////////////////////////////////////
// PHENOLOGICAL METRICS ESTIMATOR IN MOUNTAIN AREAS (PMEMA)
////////////////////////////////////
////////////////////////////////////
// Phenological Metric Estimator (PME) with Sentinel-2 and Landsat 4-9 collection in
mountain areas
// The code realized is open-source and everyone is encouraged to improve it.
// PME is written in Javascript and runnable in Google Earth Engine dashboard.
// This code permits to compute the Phenological Metrics from high resolution scien-
tific Earth Observation data
// (A) SOS - Start of Active Phenological Season;
// (B) EOS - End of Active Phenological Season;
// (C) LOS - Length of Active Phenological Season
////////////////////////////////////
////////////////////////////////////
// EO data have been processed in by performing a time series smoothing (with 20-
day composition and cubic interpolation) and
// a threshold method can be applied
// Author: Tommaso Orusa tommaso.orusa@gmail.com or torusa@invallee.it
// or tommaso.orusa@unito.it
// the present code was implemented starting from the work of A. Descals

var parts = " +
"\n - PARAMETERS SETTINGS (PART I)" +
"\n -- FUNCTION SETTINGS TO PERFORM CUBIC INTERPOLATION (PART II)
" +
"\n --- EO DATA (PART III) " +
"\n ---- COMPOSITES CREATION (PART IV) " +
"\n ----- WINDOW SIZE SETTINGS FOR EMPTY COMPOSITES (PART V) " +
"\n ----- TIME-SERIES INTERPOLATION (PART VI) " +
"\n ----- PHENOLOGICAL METRICS COMPUTATION (PART VII) " +
"\n ----- RESULTS PLOTTING (PART VIII) " +
"\n ----- LEGEND SETTINGS (PART IX) " +
"\n ----- EXPORT ... JOIN THE PHENOLOGICAL SIDE OF THE EARTH EN-
GINE! (PART X) ";
print(parts);

////////////////////////////////////
////////////////////////////////////
// PART I - PARAMETERS SETTINGS
////////////////////////////////////
////////////////////////////////////

```

```

////////////////////////////////////
// SET AREA - your Area of Interest (AOI) as feture collection by importing into the
Assets or drawing it
////////////////////////////////////
var ROI = AOI;
Map.centerObject(ROI,6);
// (Optional) Set a point in which you want to compute PME or a polygon
// WARNING if noting it will be set indicate the same name of the ROI it will return
errors in the console if the areas are too wide but the code works perfectly you o0nly have
to export
var point = p;
var geometry = g;
////////////////////////////////////
// SET TIME
////////////////////////////////////
// Set processing year of interest
var year1 = 2021;
// Set composites temporal resolution - LAG
var lag = 20;
// Define the time range to compute the PME. As Phenological Active Season it is
suggested
var startDate = year1+'-03-15'; // YYYY-MM-DD start YYYY-03-01
var endDate = year1+'-12-20'; // YYYY-MM-DD start YYYY-12-20
////////////////////////////////////
// SET VI - the vegetation index (VI) on which you like to compute PME
// (VI) options:
// 'ndvi' : Normalized Difference Vegetation Index
// 'evi' : Enhanced vegetation index
// 'ndpi' : normalized difference phenology index
// 'gcc' : Green chromatic coordinate
// For further information please see: https://www.indexdatabase.de/
var VI_index = 'ndvi' ;
// Set the percentage of amplitude for the estimation of the threshold
var th = 0.5; // advice 0.2-0.8
// Set the minimum NDVI value for the reclassification of non-vegetated
var threshMin = 0.3;
// Set scale of the analysis // between 100 to 50 optimal <50 to 10 no graph plot
var scale = 1000;

////////////////////////////////////
////////////////////////////////////
// PART II -- FUNCTION SETTINGS TO PERFORM CUBIC INTERPOLATION
////////////////////////////////////
////////////////////////////////////

var cubicInterpolation = function(collection,step){

var listDekads = ee.List.sequence(1, collection.size().subtract(3), 1);

var colInterp = listDekads.map(function(ii){

var ii = ee.Number(ii);

```

```

var p0 = ee.Image(collection.toList(10000).get(ee.Number(ii).subtract(1)));
var p1 = ee.Image(collection.toList(10000).get(ii));
var p2 = ee.Image(collection.toList(10000).get(ee.Number(ii).add(1)));
var p3 = ee.Image(collection.toList(10000).get(ee.Number(ii).add(2)));

var diff01 = ee.Date(p1.get('system:time_start')).difference(ee.Date(p0.get('system:time_start')), 'day');
var diff12 = ee.Date(p2.get('system:time_start')).difference(ee.Date(p1.get('system:time_start')), 'day');
var diff23 = ee.Date(p3.get('system:time_start')).difference(ee.Date(p2.get('system:time_start')), 'day');

var diff01nor = diff01.divide(diff12);
var diff12nor = diff12.divide(diff12);
var diff23nor = diff23.divide(diff12);

var f0 = p1;
var f1 = p2;
var f0p = (p2.subtract(p0)).divide(diff01nor.add(diff12nor));
var f1p = (p3.subtract(p1)).divide(diff12nor.add(diff23nor));

var a = (f0.multiply(2)).subtract(f1.multiply(2)).add(f0p).add(f1p);
var b = (f0.multiply(-3)).add(f1.multiply(3)).subtract(f0p.multiply(2)).subtract(f1p);
var c = f0p;
var d = f0;

//////////
var xValues = ee.List.sequence(0,diff12.subtract(1),step); //!!!!!!!!!!!!!!

var xDates = ee.List.sequence(p1.get('system:time_start'),p2.get('system:time_start'),86400000);
print(xDates);

var interp = (xValues.map(function(x){
  var im = ee.Image(ee.Number(x).divide(diff12));
  return (im.pow(3)).multiply(a).add((im.pow(2)).multiply(b)).add(im.multiply(c)).add(d)
    .set('system:time_start',ee.Number(xDates.get(x)));
}));

return interp;
});

var colInterp = ee.ImageCollection(colInterp.flatten());

return colInterp;
};

//////////
//////////
// PART III --- EO DATA
//////////
//////////

```

```

// Select satellite sensor and deactivate the other satellite with the symbols
// at the beginning /* at the end */ only in the collection!!!

/// SELECT SENTINEL-2 or LANDSAT

// Sentinel-2 Collection

var S2 = ee.ImageCollection("COPERNICUS/S2_SR_HARMONIZED")
  .filterDate(startDate,endDate)
  .filterBounds(ROI)
  .filterMetadata('CLOUD_COVERAGE_ASSESSMENT','less_than',50);
  //.filterMetadata('SNOW_ICE_PERCENTAGE','less_than',70);

// Mask clouds, snow, shadows
var S2 = S2.map(function(im){
// Adopt SCL mask
var SCL = im.select('SCL');
var SCLmask = SCL.eq(1).or(SCL.eq(4)).or(SCL.eq(5)).or(SCL.eq(11)); // mask for
non-valid observations
var snowMask = SCL.eq(11); // snow mask
// Rescale Band
var blue = im.select('B2').multiply(0.0001);
var green = im.select('B3').multiply(0.0001);
var red = im.select('B4').multiply(0.0001);
var nir = im.select('B8').multiply(0.0001);
var swir = im.select('B12').multiply(0.0001);

// Generate VIs
var ndvi = im.normalizedDifference(['B8','B4']).rename('ndvi');
var evi = (ee.Image(2.5).multiply(nir.subtract(red))).divide(nir.add(red.multiply(6)).subtract(blue.multiply(7.5)).add(1)).rename('evi');
var gcc = green.divide(green.add(red).add(blue)).rename('gcc');
var alpha = ee.Image(0.51); // alpha variable in NDPI formula
var ndpi = (nir.subtract(alpha.multiply(red).add((ee.Image(1).subtract(alpha)).multiply(swir))))).divide(nir.add(alpha.multiply(red).add((ee.Image(1).subtract(alpha)).multiply(swir)))).rename('ndpi');

// https://www.pucv.cl/uuaa/labgrs/proyectos/avocado

// Set VI of interest
var bio = ndvi.addBands(evi).addBands(ndpi).addBands(gcc).select(VI_index).rename('bio');
  return bio.where(bio.lt(threshMin),threshMin) // force low values to threshMin
  .where(snowMask,threshMin) // force snow values to threshMin
  .updateMask(SCLmask) // mask non-valid observations
  .set('system:time_start', im.get('system:time_start'));
});

////////////////////
/*
// Landsat Collection Merged

```

```

// QA_PIXEL band (CFMask) to mask unwanted pixels.
function maskLandsatsr(image) {
  // Bit 0 - Fill
  // Bit 1 - Dilated Cloud
  // Bit 2 - Cirrus
  // Bit 3 - Cloud
  // Bit 4 - Cloud Shadow
  var qaMask = image.select('QA_PIXEL').bitwiseAnd(parseInt('11111', 2)).eq(0);
  var saturationMask = image.select('QA_RADSAT').eq(0);

  // Apply the scaling factors to the appropriate bands.
  var opticalBands = image.select('SR_B.').multiply(0.0000275).add(-0.2);

  // Replace the original bands with the scaled ones and apply the masks.
  return image.addBands(opticalBands, null, true)
    .updateMask(qaMask)
    .updateMask(saturationMask);
}

// Standard names to rename the bands regardless of collection
var selected_bands = ['blue','green','red','nir','swir','swir2','QA_PIXEL'];
// Merge the 3 collections, select, and rename the bands to standard names
var S2 = ee.ImageCollection('LANDSAT/LT04/C02/T1_L2')
  .select(['SR_B1','SR_B2','SR_B3','SR_B4','SR_B5','SR_B7', 'QA_PIXEL'],se-
lected_bands)
  .merge(ee.ImageCollection('LANDSAT/LT05/C02/T1_L2')
    .select(['SR_B1','SR_B2','SR_B3','SR_B4','SR_B5','SR_B7', 'QA_PIXEL'],se-
lected_bands)
    .merge(ee.ImageCollection('LANDSAT/LE07/C02/T1_L2') // ATTENTION TO USE
IMAGES AFTER MAY 2003 DUE TO L7 FAILURE
      .select(['SR_B1','SR_B2','SR_B3','SR_B4','SR_B5','SR_B7', 'QA_PIXEL'],se-
lected_bands))
    .merge(ee.ImageCollection('LANDSAT/LC08/C02/T1_L2')
      .select(['SR_B2','SR_B3','SR_B4','SR_B5','SR_B6','SR_B7', 'QA_PIXEL'],se-
lected_bands))
    .merge(ee.ImageCollection('LANDSAT/LC09/C02/T1_L2')
      .select(['SR_B2','SR_B3','SR_B4','SR_B5','SR_B6','SR_B7', 'QA_PIXEL'],se-
lected_bands))
    .sort("system:time_start") // Sort by Date
    .filterDate(startDate,endDate) // Filter by date
    .filterBounds(ROI));
  //filterMetadata("CLOUD_COVER","less_than",70) // Filter by cloud cover
  //map(function(image){return image.clip(ROI)}));

var S2 = S2.map(function(im) {
  var SCL = im.select('QA_PIXEL').bitwiseAnd(parseInt('11111', 2));
  var SCLmask = SCL.eq(1).or(SCL.eq(2)).or(SCL.eq(3)).or(SCL.eq(4)); // mask for non-
valid observations
  var snowMask = SCL.eq(5); // snow mask
  // Rescale Band
  var blue = im.select('blue').multiply(0.0000275).add(-0.2); //multiply(0.0001)
  var green = im.select('green').multiply(0.0000275).add(-0.2);
  var red = im.select('red').multiply(0.0000275).add(-0.2);
  var nir = im.select('nir').multiply(0.0000275).add(-0.2);

```

```

var swir = im.select('swir').multiply(0.0000275).add(-0.2);

// Generate VIs
var ndvi = im.normalizedDifference(['nir','red']).rename('ndvi');
var evi = (ee.Image(2.5).multiply(nir.subtract(red))).divide(nir.add(red.multiply(6)).subtract(blue.multiply(7.5)).add(1)).rename('evi');
var gcc = green.divide(green.add(red).add(blue)).rename('gcc');
var alpha = ee.Image(0.51); // alpha variable in NDPI formula
var ndpi = (nir.subtract(alpha.multiply(red).add((ee.Image(1).subtract(alpha)).multiply(swir)))).divide(nir.add(alpha.multiply(red).add((ee.Image(1).subtract(alpha)).multiply(swir)))).rename('ndpi');

// https://www.pucv.cl/uuaa/labgrs/proyectos/avocado

// Set VI of interest
var bio = ndvi.addBands(evi).addBands(ndpi).addBands(gcc).select(VI_index).rename('bio');
return bio.where(bio.lt(threshMin),threshMin) // force low values to threshMin
.where(snowMask,threshMin) // force snow values to threshMin
.updateMask(SCLmask) // mask non-valid observations
.set('system:time_start', im.get('system:time_start'));

});
*/
////////////////////////////////////
// PART IV ---- COMPOSITES CREATION
////////////////////////////////////
/////

// Generate a list of dates
var listDates = ee.List.sequence(ee.Date(startDate).millis(), ee.Date(endDate).millis(),
86400000*lag);

// Map the dates
var colDekadsRaw = ee.ImageCollection(listDates.map(function(dd){
// Moving window central day
var date_window = ee.Date(ee.Number(dd));
// Moving window first day
var date_startW = date_window.advance(-lag/2, 'days');
// Moving window last day
var date_endW = date_window.advance(lag/2, 'days');
// Filter the collection for a period equal to lag
var col_window = S2.filterDate(date_startW,date_endW);
// Mean computation
var out = col_window.reduce(ee.Reducer.mean());
return out
.set('system:time_start',date_window.millis()) // Define time property
.set('empty', col_window.size().eq(0)); // Flag dates without images
}).flatten());

// filter dates without images and fill them with the minimum NDVI value
var colDekadsEmpty = colDekadsRaw.filterMetadata('empty', 'equals', 1).map(function(im){

```

```

        return ee.Image(threshMin).rename('bio_mean').copyProperties(im,['system:time_start']);
    });
    var colDekads = colDekadsRaw.filterMetadata('empty', 'equals', 0).merge(colDekadsEmpty);

    // plot composite
    var chart1 = ui.Chart.image.series(colDekads.select('bio_mean'), point, ee.Reducer.first(), scale)
        .setOptions({title: 'Moving average every '+lag+' days',
            lineWidth: 0,
            pointSize: 4});

    // print(chart1)

    ////////////////////////////////////////////////////
    // PART V ----- WINDOW SIZE SETTINGS FOR EMPTY COMPOSITES
    ////////////////////////////////////////////////////
    var colDekads = colDekads.map(function(im){
        // Window central day
        var date_window = ee.Date(im.get('system:time_start'));
        // Window first day
        var date_startW = date_window.advance(-lag*2, 'days');
        // Window last day
        var date_endW = date_window.advance(lag*2, 'days');
        // Compute mean with images before and after the central window
        var meanIm1 = colDekads.filterDate(date_startW,date_window.advance(1,
'days')).reduce(ee.Reducer.mean());
        var meanIm2 = colDekads.filterDate(date_window.advance(-1,
'days'),date_endW).reduce(ee.Reducer.mean());
        var meanIm = (meanIm1.add(meanIm2)).divide(2);
        return im
    });
    // Apply the gap-filling only to empty values
    .unmask(meanIm)
    .copyProperties(im,['system:time_start']);
    });

    var colDekads = colDekads.sort('system:time_start');
    // Plot gap-filled composites
    var chart1 = ui.Chart.image.series(colDekads, point, ee.Reducer.first(), scale)
        .setOptions({title: 'Moving average gap-filled',
            lineWidth: 0,
            pointSize: 4});

    print(chart1);

    // FLAG PIXELS WITH NO VALID OBSERVATIONS
    var flagNoObs = colDekads.map(function(im){
        return im.unmask(-999).eq(-999).copyProperties(im,['system:time_start']);
    }).filterDate('2021-05-01','2021-10-01').sum().eq(0).rename('flagNoObs');

    Map.addLayer(flagNoObs.clip(ROI),{min:0,max:1},'Pixels with empty composites',false);

```

```

////////////////////////////////////
// PART VI ----- TIME-SERIES INTERPOLATION
////////////////////////////////////
var interp = cubicInterpolation(colDekads,1);

// Plot daily observations, composites, and interpolated values
var chart1 = ui.Chart.image.series(S2.merge(colDekads.select('bio_mean')).merge(interp), point, ee.Reducer.first(), 10)
  .setOptions({
    title: 'Phenology',
    vAxis: {
      title: ''
    },
    series: {
      0: {color: '000000',lineWidth: 0, pointSize: 2},
      1: {color: '00b8ff',lineWidth: 0, pointSize: 5},
      2: {color: '19a700',lineWidth: 1, pointSize: 0}
    }
  });

print(chart1);

////////////////////////////////////
//PART VII ----- PHENOLOGICAL METRICS COMPUTATION
////////////////////////////////////
// Define doy = 0
var init = ee.Image(ee.Date((year1-1)+'-12-31').millis());
// Timestamp band adding
var interp = interp.map(function(im){
  return im.rename('bio_interp').addBands(im.metadata('system:time_start','date1'))
    .set('system:time_start', im.get('system:time_start'));
});
// Estimate amplitude of time series
var minND = ee.Image(threshMin);
var maxND = colDekads.max();
var amplitude = maxND.subtract(minND);

// Threshold image computation
var thresh = amplitude.multiply(th).add(minND).rename('bio_interp');

// mask values below the threhsold
var col_aboveThresh = interp.map(function(im){
  var out = im.select('bio_interp').gt(thresh);
  return im.updateMask(out) //
    .copyProperties(im,['system:time_start']);
});

////////// START OF SEASON
// SOS (first day below the threhsold)
var SOS = col_aboveThresh.reduce(ee.Reducer.firstNonNull()).select('date1_first').rename('SOS');
var SOS_doy = SOS.subtract(init).divide(86400000); // convert to doy

```



```

////////// END OF SEASON
// EOS (last day below the threhsold)
var EOS = col_aboveThresh.reduce(ee.Reducer.lastNonNull()).select('date1_last').re-
name('EOS');
var EOS_doy = EOS.subtract(init).divide(86400000); // convert to doy

////////// LENGHT OF SEASON
// LOS
var LOS = EOS_doy.subtract(SOS_doy);
var phenoPalette = ['ff0000','ff8d00','fbff00','4aff00','00ffe7','01b8ff','0036ff','fb00ff'];
var visLOS = {min:100,max:365,palette:phenoPalette};
Map.addLayer(LOS.clip(ROI), visLOS,'LOS',true);

//////////
// PART VIII ----- RESULTS PLOTTING
//////////
print('Threshold:',thresh.reduceRegion(ee.Reducer.first(), point, 1).get('bio_interp'));
print('SOS',ee.Date(SOS.reduceRegion(ee.Reducer.first(), point, 1).get('SOS')));
print('EOS',ee.Date(EOS.reduceRegion(ee.Reducer.first(), point, 1).get('EOS')));

var phenoPalette = ['ff0000','ff8d00','fbff00','4aff00','00ffe7','01b8ff','0036ff','fb00ff'];
var visSOS = {min:120,max:200,palette:phenoPalette};
var visEOS = {min:200,max:300,palette:phenoPalette};
Map.addLayer(SOS_doy.clip(ROI),visSOS,'SOS',true);
Map.addLayer(EOS_doy.clip(ROI),visEOS,'EOS',false);

var vPoly = ee.Image().toByte().paint(ROI, 2,4);
Map.addLayer(vPoly, {palette: '000000', max: 3, opacity: 0.9}, 'Region of interest');

//PLOT GRAPH
var SOSdict = SOS_doy.reduceRegion(ee.Reducer.first(), point, scale);
var EOSdict = EOS_doy.reduceRegion(ee.Reducer.first(), point, scale);

var blankImage1 = ee.Image(0).set('doy',SOSdict.get('SOS')).rename('SOS').int()
.set('system:time_start', ee.Date(year1+'-01-01').advance(ee.Num-
ber(SOSdict.get('SOS')),'day').millis());
var blankImage2 = ee.Image(1).set('doy',ee.Number(SOSdict.get('SOS')).add(1)).re-
name('SOS').int()
.set('system:time_start', ee.Date(year1+'-01-01').advance(ee.Num-
ber(SOSdict.get('SOS')).add(1),'day').millis());
var blankImage3 = ee.Image(0).set('doy',EOSdict.get('EOS')).rename('EOS').int()
.set('system:time_start', ee.Date(year1+'-01-01').advance(ee.Num-
ber(EOSdict.get('EOS')),'day').millis());
var blankImage4 = ee.Image(1).set('doy',ee.Number(EOSdict.get('EOS')).add(1)).re-
name('EOS').int()
.set('system:time_start', ee.Date(year1+'-01-01').advance(ee.Num-
ber(EOSdict.get('EOS')).add(1),'day').millis());

var lineSoS = ee.ImageCollection.fromImages([blankImage1,blankImage2]);
var lineEoS = ee.ImageCollection.fromImages([blankImage3,blankImage4]);

```

```

var resultsPanel = ui.Panel({style: {position: 'bottom-right',width: '500px'}});
Map.add(resultsPanel);

var chart1 = ui.Chart.image.series({imageCollection:
S2.merge(lineEoS).merge(lineSoS).merge(interp.select('bio_interp')),
  region: point,
  reducer: ee.Reducer.first(),
  scale: scale,
  // xProperty: 'doy'
})
.setOptions({title: 'Sentinel-2 '+VI_index,
  interpolateNulls: true,
  series: {
    0: {pointSize: 0, lineWidth: 3, color: '2800ff'}, // EoS
    2: {pointSize: 2, lineWidth: 0, color: '000000'}, // L8
    1: {pointSize: 0, lineWidth: 3, color: '3eff00'}, // SoS
    3: {pointSize: 0, lineWidth: 2, color: 'f13030'}, // S2
  },
  vAxis: {
    viewWindow: {
      min: threshMin-0.05,
      max: 1
    }
  }
});
// print(chart1)
resultsPanel.clear().add(chart1);

////////////////////////////////////
////////////////////////////////////
// PART IX ----- LEGEND SETTINGS
////////////////////////////////////
////////////////////////////////////
function ColorBar() {
  return ui.Thumbnail({
    image: ee.Image.pixelLonLat().select(0),
    params: {
      bbox: [0, 0, 1, 0.1],
      dimensions: '100x10',
      format: 'png',
      min: 0,
      max: 1,
      palette: phenoPalette,
    },
    style: {stretch: 'horizontal', margin: '0px 8px'},
  });
}

function makeLegend(a,b) {
  var labelPanel = ui.Panel(
    [
      ui.Label(a, {margin: '4px 8px'}),
      ui.Label(' ',{margin: '4px 8px', textAlign: 'center', stretch: 'horizontal'}),
      ui.Label(b, {margin: '4px 8px'})
    ],

```

```

        ui.Panel.Layout.flow('horizontal'));
    return ui.Panel([ColorBar(), labelPanel]);
}

var LEGEND_TITLE_STYLE = {
    fontSize: '20px',
    fontWeight: 'bold',
    stretch: 'horizontal',
    textAlign: 'center',
    margin: '4px',
};

var LEGEND_FOOTNOTE_STYLE = {
    fontSize: '14px',
    stretch: 'horizontal',
    textAlign: 'center',
    margin: '4px',
};

Map.add(ui.Panel(
    [
        ui.Label('End of Season', LEGEND_TITLE_STYLE), makeLegend(vis-
EOS['min'],visEOS['max']),
        ui.Label('(Day of Year)', LEGEND_FOOTNOTE_STYLE)
    ],
    ui.Panel.Layout.flow('vertical'),
    {width: '230px', position: 'bottom-left'}));

Map.add(ui.Panel(
    [
        ui.Label('Start of Season', LEGEND_TITLE_STYLE),
makeLegend(visSOS['min'],visSOS['max']),
        ui.Label('(Day of Year)', LEGEND_FOOTNOTE_STYLE)
    ],
    ui.Panel.Layout.flow('vertical'),
    {width: '230px', position: 'bottom-left'}));

Map.add(ui.Panel(
    [
        ui.Label('Length of Season', LEGEND_TITLE_STYLE),
makeLegend(visLOS['min'],visLOS['max']),
        ui.Label('(Day of Year)', LEGEND_FOOTNOTE_STYLE)
    ],
    ui.Panel.Layout.flow('vertical'),
    {width: '230px', position: 'bottom-left'}));

var titleLabel = ui.Label(
    'PHENOLOGICAL METRICS ESTIMATOR IN MOUNTAIN AREAS
(PMEMA)+year1+', {fontWeight: 'bold', fontSize: '20px'});
Map.add(titleLabel);

Map.addLayer(geometry,{min:0,max:1},'point',true);
////////////////////////////////////
////////

```

```

// PART X ----- EXPORT SOS EOS LOS
////////////////////////////////////////////////////////////////////////////////////////////////////////////////////////////////
////////////////////////////////////////////////////////////////

// SOS
Export.image.toDrive({
  image: SOS_doy.clip(ROI),
  region: AOI,
  description: 'SOS',
  scale: 100,
  fileFormat: 'GeoTIFF',
  maxPixels: 3784216672400,
  //crs: 'EPSG 23032',
  //folder: 'S2',
});

// EOS
Export.image.toDrive({
  image: EOS_doy.clip(ROI),
  region: AOI,
  description: 'EOS',
  scale: 100,
  fileFormat: 'GeoTIFF',
  maxPixels: 3784216672400,
  //crs: 'EPSG 23032',
  //folder: 'S2',
});

// LOS
Export.image.toDrive({
  image: LOS.clip(ROI),
  region: AOI,
  description: 'LOS',
  scale: 100,
  fileFormat: 'GeoTIFF',
  maxPixels: 3784216672400,
  //crs: 'EPSG 23032',
  //folder: 'S2',
});
print('JOIN THE PHENOLOGICAL SIDE OF THE EARTH ENGINE! ');
////////////////////////////////////////////////////////////////

```

## Appendix B

Here below we provide the Phenological metrics computed in the validation set points with GEE code both with Sentinel-2 and Landsat considering also *r* greenbrown package and MODIS.

| ID | Sentinel-2 GEE |     |     |     | <i>r</i> Greenbrown |     |     |     | MODIS |     |     |     |
|----|----------------|-----|-----|-----|---------------------|-----|-----|-----|-------|-----|-----|-----|
|    | SOS            | EOS | POS | LOS | SOS                 | EOS | POS | LOS | SOS   | EOS | POS | LOS |
| 1  | 94             | 273 | 184 | 179 | 95                  | 275 | 185 | 180 | 96    | 276 | 186 | 180 |
| 2  | 126            | 273 | 200 | 147 | 125                 | 273 | 199 | 148 | 129   | 275 | 202 | 146 |
| 3  | 140            | 292 | 216 | 152 | 143                 | 290 | 217 | 147 | 136   | 287 | 212 | 151 |
| 4  | 94             | 329 | 212 | 235 | 94                  | 330 | 212 | 236 | 88    | 333 | 211 | 245 |
| 5  | 94             | 333 | 214 | 239 | 95                  | 333 | 214 | 238 | 96    | 335 | 216 | 239 |
| 6  | 127            | 330 | 229 | 203 | 127                 | 331 | 229 | 204 | 128   | 329 | 229 | 201 |

|    |     |     |     |     |     |     |     |     |     |     |     |     |
|----|-----|-----|-----|-----|-----|-----|-----|-----|-----|-----|-----|-----|
| 7  | 94  | 332 | 213 | 238 | 98  | 331 | 215 | 233 | 93  | 333 | 213 | 240 |
| 8  | 154 | 268 | 211 | 114 | 155 | 268 | 212 | 113 | 155 | 267 | 211 | 112 |
| 9  | 129 | 332 | 231 | 203 | 129 | 332 | 231 | 203 | 128 | 333 | 231 | 205 |
| 10 | 94  | 328 | 211 | 234 | 94  | 329 | 212 | 235 | 95  | 327 | 211 | 232 |
| 11 | 139 | 287 | 213 | 148 | 139 | 287 | 213 | 148 | 138 | 288 | 213 | 150 |
| 12 | 120 | 332 | 226 | 212 | 118 | 335 | 227 | 217 | 121 | 331 | 226 | 210 |
| 13 | 94  | 331 | 213 | 237 | 94  | 331 | 213 | 237 | 93  | 332 | 213 | 239 |
| 14 | 140 | 193 | 167 | 53  | 141 | 193 | 167 | 52  | 141 | 192 | 167 | 51  |
| 15 | 94  | 328 | 211 | 234 | 94  | 328 | 211 | 234 | 93  | 329 | 211 | 236 |
| 16 | 175 | 235 | 205 | 60  | 175 | 236 | 206 | 61  | 176 | 236 | 206 | 60  |
| 17 | 128 | 273 | 201 | 145 | 128 | 273 | 201 | 145 | 129 | 274 | 202 | 145 |
| 18 | 116 | 330 | 223 | 214 | 116 | 330 | 223 | 214 | 121 | 333 | 227 | 212 |
| 19 | 124 | 273 | 199 | 149 | 124 | 273 | 199 | 149 | 125 | 274 | 200 | 149 |
| 20 | 94  | 273 | 184 | 179 | 94  | 273 | 184 | 179 | 95  | 277 | 186 | 182 |
| 21 | 137 | 322 | 230 | 185 | 138 | 322 | 230 | 184 | 138 | 323 | 231 | 185 |
| 22 | 133 | 310 | 222 | 177 | 133 | 311 | 222 | 178 | 138 | 314 | 226 | 176 |
| 23 | 150 | 273 | 212 | 123 | 149 | 274 | 212 | 125 | 150 | 273 | 212 | 123 |
| 24 | 164 | 313 | 239 | 149 | 165 | 314 | 240 | 149 | 159 | 314 | 237 | 155 |
| 25 | 140 | 281 | 211 | 141 | 140 | 281 | 211 | 141 | 134 | 287 | 211 | 153 |
| 26 | 174 | 273 | 224 | 99  | 175 | 274 | 225 | 99  | 177 | 276 | 227 | 99  |
| 27 | 114 | 333 | 224 | 219 | 113 | 332 | 223 | 219 | 117 | 336 | 227 | 219 |
| 28 | 123 | 273 | 198 | 150 | 123 | 273 | 198 | 150 | 126 | 276 | 201 | 150 |
| 29 | 94  | 328 | 211 | 234 | 94  | 328 | 211 | 234 | 97  | 331 | 214 | 234 |
| 30 | 114 | 328 | 221 | 214 | 113 | 327 | 220 | 214 | 116 | 330 | 223 | 214 |
| 31 | 107 | 332 | 220 | 225 | 107 | 332 | 220 | 225 | 109 | 334 | 222 | 225 |
| 32 | 129 | 273 | 201 | 144 | 129 | 273 | 201 | 144 | 130 | 274 | 202 | 144 |
| 33 | 155 | 265 | 210 | 110 | 155 | 265 | 210 | 110 | 162 | 272 | 217 | 110 |
| 34 | 102 | 273 | 188 | 171 | 101 | 272 | 187 | 171 | 94  | 268 | 181 | 174 |
| 35 | 99  | 329 | 214 | 230 | 98  | 328 | 213 | 230 | 99  | 333 | 216 | 234 |
| 36 | 146 | 300 | 223 | 154 | 145 | 299 | 222 | 154 | 150 | 300 | 225 | 150 |
| 37 | 94  | 329 | 212 | 235 | 93  | 328 | 211 | 235 | 94  | 333 | 214 | 239 |
| 38 | 94  | 273 | 184 | 179 | 93  | 272 | 183 | 179 | 98  | 273 | 186 | 175 |
| 39 | 122 | 333 | 228 | 211 | 121 | 332 | 227 | 211 | 122 | 339 | 231 | 217 |
| 40 | 94  | 333 | 214 | 239 | 93  | 332 | 213 | 239 | 100 | 339 | 220 | 239 |
| 41 | 94  | 333 | 214 | 239 | 93  | 332 | 213 | 239 | 101 | 340 | 221 | 239 |
| 42 | 94  | 333 | 214 | 239 | 93  | 332 | 213 | 239 | 101 | 340 | 221 | 239 |
| 43 | 115 | 329 | 222 | 214 | 114 | 328 | 221 | 214 | 122 | 336 | 229 | 214 |
| 44 | 94  | 326 | 210 | 232 | 93  | 325 | 209 | 232 | 96  | 328 | 212 | 232 |
| 45 | 126 | 319 | 223 | 193 | 125 | 318 | 222 | 193 | 128 | 321 | 225 | 193 |
| 46 | 126 | 319 | 223 | 193 | 125 | 318 | 222 | 193 | 124 | 317 | 221 | 193 |
| 47 | 121 | 324 | 223 | 203 | 120 | 323 | 222 | 203 | 119 | 322 | 221 | 203 |
| 48 | 94  | 273 | 184 | 179 | 93  | 272 | 183 | 179 | 92  | 271 | 182 | 179 |
| 49 | 94  | 328 | 211 | 234 | 94  | 328 | 211 | 234 | 92  | 326 | 209 | 234 |
| 50 | 122 | 273 | 198 | 151 | 122 | 273 | 198 | 151 | 120 | 271 | 196 | 151 |
| 51 | 94  | 273 | 184 | 179 | 94  | 273 | 184 | 179 | 92  | 271 | 182 | 179 |
| 52 | 169 | 247 | 208 | 78  | 170 | 248 | 209 | 78  | 167 | 245 | 206 | 78  |
| 53 | 146 | 299 | 223 | 153 | 147 | 300 | 224 | 153 | 144 | 297 | 221 | 153 |
| 54 | 102 | 333 | 218 | 231 | 103 | 334 | 219 | 231 | 100 | 331 | 216 | 231 |
| 55 | 132 | 301 | 217 | 169 | 133 | 302 | 218 | 169 | 130 | 299 | 215 | 169 |
| 56 | 94  | 273 | 184 | 179 | 95  | 274 | 185 | 179 | 92  | 271 | 182 | 179 |
| 57 | 112 | 329 | 221 | 217 | 113 | 330 | 222 | 217 | 110 | 327 | 219 | 217 |
| 58 | 174 | 299 | 237 | 125 | 175 | 300 | 238 | 125 | 172 | 297 | 235 | 125 |
| 59 | 109 | 273 | 191 | 164 | 110 | 274 | 192 | 164 | 107 | 271 | 189 | 164 |
| 60 | 174 | 273 | 224 | 99  | 173 | 272 | 223 | 99  | 172 | 271 | 222 | 99  |

|     |     |     |     |     |     |     |     |     |     |     |     |     |
|-----|-----|-----|-----|-----|-----|-----|-----|-----|-----|-----|-----|-----|
| 61  | 135 | 233 | 184 | 98  | 134 | 232 | 183 | 98  | 133 | 231 | 182 | 98  |
| 62  | 147 | 213 | 180 | 66  | 146 | 212 | 179 | 66  | 145 | 211 | 178 | 66  |
| 63  | 103 | 333 | 218 | 230 | 102 | 332 | 217 | 230 | 101 | 331 | 216 | 230 |
| 64  | 105 | 332 | 219 | 227 | 106 | 333 | 220 | 227 | 103 | 330 | 217 | 227 |
| 65  | 147 | 273 | 210 | 126 | 148 | 274 | 211 | 126 | 145 | 271 | 208 | 126 |
| 66  | 105 | 332 | 219 | 227 | 106 | 333 | 220 | 227 | 103 | 330 | 217 | 227 |
| 67  | 133 | 273 | 203 | 140 | 134 | 274 | 204 | 140 | 131 | 271 | 201 | 140 |
| 68  | 94  | 317 | 206 | 223 | 95  | 316 | 206 | 221 | 92  | 315 | 204 | 223 |
| 69  | 100 | 329 | 215 | 229 | 101 | 328 | 215 | 227 | 98  | 327 | 213 | 229 |
| 70  | 108 | 330 | 219 | 222 | 109 | 329 | 219 | 220 | 106 | 328 | 217 | 222 |
| 71  | 94  | 328 | 211 | 234 | 95  | 327 | 211 | 232 | 92  | 326 | 209 | 234 |
| 72  | 121 | 328 | 225 | 207 | 122 | 329 | 226 | 207 | 119 | 326 | 223 | 207 |
| 73  | 112 | 329 | 221 | 217 | 113 | 330 | 222 | 217 | 110 | 327 | 219 | 217 |
| 74  | 174 | 299 | 237 | 125 | 175 | 300 | 238 | 125 | 172 | 297 | 235 | 125 |
| 75  | 94  | 193 | 144 | 99  | 94  | 193 | 144 | 99  | 92  | 191 | 142 | 99  |
| 76  | 103 | 320 | 212 | 217 | 103 | 320 | 212 | 217 | 101 | 318 | 210 | 217 |
| 77  | 141 | 268 | 205 | 127 | 141 | 268 | 205 | 127 | 139 | 266 | 203 | 127 |
| 78  | 94  | 333 | 214 | 239 | 94  | 333 | 214 | 239 | 92  | 331 | 212 | 239 |
| 79  | 166 | 302 | 234 | 136 | 166 | 302 | 234 | 136 | 164 | 300 | 232 | 136 |
| 80  | 94  | 273 | 184 | 179 | 94  | 273 | 184 | 179 | 92  | 271 | 182 | 179 |
| 81  | 107 | 260 | 184 | 153 | 106 | 259 | 183 | 153 | 105 | 258 | 182 | 153 |
| 82  | 141 | 268 | 205 | 127 | 140 | 267 | 204 | 127 | 139 | 266 | 203 | 127 |
| 83  | 136 | 296 | 216 | 160 | 135 | 295 | 215 | 160 | 134 | 294 | 214 | 160 |
| 84  | 135 | 273 | 204 | 138 | 136 | 274 | 205 | 138 | 133 | 271 | 202 | 138 |
| 85  | 126 | 297 | 212 | 171 | 127 | 298 | 213 | 171 | 124 | 295 | 210 | 171 |
| 86  | 105 | 329 | 217 | 224 | 106 | 330 | 218 | 224 | 103 | 327 | 215 | 224 |
| 87  | 94  | 333 | 214 | 239 | 95  | 334 | 215 | 239 | 92  | 331 | 212 | 239 |
| 88  | 103 | 273 | 188 | 170 | 104 | 272 | 188 | 168 | 101 | 271 | 186 | 170 |
| 89  | 164 | 216 | 190 | 52  | 165 | 215 | 190 | 50  | 162 | 214 | 188 | 52  |
| 90  | 94  | 316 | 205 | 222 | 94  | 316 | 205 | 222 | 92  | 314 | 203 | 222 |
| 91  | 115 | 233 | 174 | 118 | 115 | 233 | 174 | 118 | 113 | 231 | 172 | 118 |
| 92  | 94  | 273 | 184 | 179 | 94  | 273 | 184 | 179 | 92  | 271 | 182 | 179 |
| 93  | 116 | 333 | 225 | 217 | 116 | 333 | 225 | 217 | 114 | 331 | 223 | 217 |
| 94  | 97  | 273 | 185 | 176 | 97  | 273 | 185 | 176 | 95  | 271 | 183 | 176 |
| 95  | 94  | 273 | 184 | 179 | 95  | 274 | 185 | 179 | 92  | 271 | 182 | 179 |
| 96  | 94  | 273 | 184 | 179 | 95  | 274 | 185 | 179 | 92  | 271 | 182 | 179 |
| 97  | 104 | 253 | 179 | 149 | 105 | 254 | 180 | 149 | 102 | 251 | 177 | 149 |
| 98  | 149 | 261 | 205 | 112 | 150 | 262 | 206 | 112 | 147 | 259 | 203 | 112 |
| 99  | 94  | 332 | 213 | 238 | 95  | 333 | 214 | 238 | 92  | 330 | 211 | 238 |
| 100 | 103 | 273 | 188 | 170 | 104 | 274 | 189 | 170 | 101 | 271 | 186 | 170 |
| 101 | 169 | 250 | 210 | 81  | 170 | 251 | 211 | 81  | 167 | 248 | 208 | 81  |
| 102 | 105 | 273 | 189 | 168 | 106 | 274 | 190 | 168 | 103 | 271 | 187 | 168 |
| 103 | 94  | 333 | 214 | 239 | 93  | 334 | 214 | 241 | 92  | 331 | 212 | 239 |
| 104 | 121 | 311 | 216 | 190 | 120 | 312 | 216 | 192 | 119 | 309 | 214 | 190 |
| 105 | 106 | 329 | 218 | 223 | 105 | 330 | 218 | 225 | 104 | 327 | 216 | 223 |
| 106 | 140 | 270 | 205 | 130 | 139 | 271 | 205 | 132 | 138 | 268 | 203 | 130 |
| 107 | 126 | 332 | 229 | 206 | 125 | 333 | 229 | 208 | 124 | 330 | 227 | 206 |
| 108 | 137 | 273 | 205 | 136 | 136 | 274 | 205 | 138 | 135 | 271 | 203 | 136 |
| 109 | 108 | 325 | 217 | 217 | 109 | 326 | 218 | 217 | 106 | 323 | 215 | 217 |
| 110 | 162 | 259 | 211 | 97  | 163 | 260 | 212 | 97  | 160 | 257 | 209 | 97  |
| 111 | 134 | 289 | 212 | 155 | 135 | 290 | 213 | 155 | 132 | 287 | 210 | 155 |
| 112 | 131 | 309 | 220 | 178 | 132 | 310 | 221 | 178 | 129 | 307 | 218 | 178 |
| 113 | 94  | 330 | 212 | 236 | 95  | 329 | 212 | 234 | 92  | 328 | 210 | 236 |
| 114 | 102 | 273 | 188 | 171 | 103 | 272 | 188 | 169 | 100 | 271 | 186 | 171 |

|     |     |     |     |     |     |     |     |     |     |     |     |     |
|-----|-----|-----|-----|-----|-----|-----|-----|-----|-----|-----|-----|-----|
| 115 | 120 | 273 | 197 | 153 | 121 | 272 | 197 | 151 | 118 | 271 | 195 | 153 |
| 116 | 136 | 328 | 232 | 192 | 137 | 329 | 233 | 192 | 134 | 326 | 230 | 192 |
| 117 | 142 | 244 | 193 | 102 | 143 | 245 | 194 | 102 | 140 | 242 | 191 | 102 |
| 118 | 144 | 283 | 214 | 139 | 144 | 283 | 214 | 139 | 142 | 281 | 212 | 139 |
| 119 | 141 | 300 | 221 | 159 | 141 | 300 | 221 | 159 | 139 | 298 | 219 | 159 |
| 120 | 126 | 269 | 198 | 143 | 126 | 269 | 198 | 143 | 124 | 267 | 196 | 143 |
| 121 | 122 | 333 | 228 | 211 | 122 | 333 | 228 | 211 | 120 | 331 | 226 | 211 |
| 122 | 179 | 243 | 211 | 64  | 179 | 243 | 211 | 64  | 177 | 241 | 209 | 64  |
| 123 | 94  | 273 | 184 | 179 | 94  | 273 | 184 | 179 | 92  | 271 | 182 | 179 |
| 124 | 141 | 300 | 221 | 159 | 141 | 300 | 221 | 159 | 139 | 298 | 219 | 159 |
| 125 | 112 | 330 | 221 | 218 | 112 | 330 | 221 | 218 | 110 | 328 | 219 | 218 |
| 126 | 120 | 273 | 197 | 153 | 120 | 273 | 197 | 153 | 118 | 271 | 195 | 153 |
| 127 | 251 | 304 | 278 | 53  | 251 | 304 | 278 | 53  | 249 | 302 | 276 | 53  |
| 128 | 114 | 333 | 224 | 219 | 114 | 333 | 224 | 219 | 112 | 331 | 222 | 219 |
| 129 | 125 | 330 | 228 | 205 | 125 | 330 | 228 | 205 | 123 | 328 | 226 | 205 |
| 130 | 100 | 331 | 216 | 231 | 99  | 336 | 218 | 237 | 98  | 329 | 214 | 231 |
| 131 | 100 | 331 | 216 | 231 | 99  | 335 | 217 | 236 | 98  | 329 | 214 | 231 |
| 132 | 111 | 306 | 209 | 195 | 110 | 309 | 210 | 199 | 109 | 304 | 207 | 195 |
| 133 | 94  | 333 | 214 | 239 | 94  | 333 | 214 | 239 | 92  | 331 | 212 | 239 |
| 134 | 125 | 330 | 228 | 205 | 120 | 334 | 227 | 214 | 123 | 328 | 226 | 205 |
| 135 | 96  | 328 | 212 | 232 | 96  | 328 | 212 | 232 | 94  | 326 | 210 | 232 |
| 136 | 109 | 319 | 214 | 210 | 109 | 319 | 214 | 210 | 107 | 317 | 212 | 210 |
| 137 | 133 | 332 | 233 | 199 | 133 | 332 | 233 | 199 | 131 | 330 | 231 | 199 |
| 138 | 98  | 330 | 214 | 232 | 98  | 330 | 214 | 232 | 96  | 328 | 212 | 232 |
| 139 | 105 | 329 | 217 | 224 | 105 | 329 | 217 | 224 | 103 | 327 | 215 | 224 |
| 140 | 117 | 330 | 224 | 213 | 117 | 330 | 224 | 213 | 115 | 328 | 222 | 213 |
| 141 | 154 | 253 | 204 | 99  | 154 | 253 | 204 | 99  | 152 | 251 | 202 | 99  |
| 142 | 114 | 287 | 201 | 173 | 114 | 287 | 201 | 173 | 112 | 285 | 199 | 173 |
| 143 | 124 | 330 | 227 | 206 | 124 | 330 | 227 | 206 | 122 | 328 | 225 | 206 |
| 144 | 108 | 333 | 221 | 225 | 109 | 335 | 222 | 226 | 106 | 331 | 219 | 225 |
| 145 | 128 | 273 | 201 | 145 | 129 | 273 | 201 | 144 | 126 | 271 | 199 | 145 |
| 146 | 120 | 273 | 197 | 153 | 123 | 275 | 199 | 152 | 118 | 271 | 195 | 153 |
| 147 | 164 | 276 | 220 | 112 | 164 | 277 | 221 | 113 | 162 | 274 | 218 | 112 |
| 148 | 131 | 233 | 182 | 102 | 132 | 233 | 183 | 101 | 129 | 231 | 180 | 102 |
| 149 | 114 | 273 | 194 | 159 | 114 | 274 | 194 | 160 | 112 | 271 | 192 | 159 |
| 150 | 114 | 330 | 222 | 216 | 118 | 331 | 225 | 213 | 112 | 328 | 220 | 216 |
| 151 | 144 | 260 | 202 | 116 | 145 | 260 | 203 | 115 | 142 | 258 | 200 | 116 |
| 152 | 135 | 333 | 234 | 198 | 135 | 333 | 234 | 198 | 133 | 331 | 232 | 198 |
| 153 | 134 | 273 | 204 | 139 | 134 | 274 | 204 | 140 | 132 | 271 | 202 | 139 |
| 154 | 94  | 253 | 174 | 159 | 94  | 253 | 174 | 159 | 92  | 251 | 172 | 159 |
| 155 | 94  | 311 | 203 | 217 | 94  | 311 | 203 | 217 | 92  | 309 | 201 | 217 |
| 156 | 126 | 330 | 228 | 204 | 126 | 330 | 228 | 204 | 124 | 328 | 226 | 204 |
| 157 | 161 | 281 | 221 | 120 | 162 | 281 | 222 | 119 | 159 | 279 | 219 | 120 |
| 158 | 164 | 220 | 192 | 56  | 164 | 220 | 192 | 56  | 162 | 218 | 190 | 56  |
| 159 | 119 | 323 | 221 | 204 | 119 | 324 | 222 | 205 | 117 | 321 | 219 | 204 |
| 160 | 94  | 253 | 174 | 159 | 94  | 253 | 174 | 159 | 94  | 253 | 174 | 159 |
| 161 | 114 | 332 | 223 | 218 | 114 | 332 | 223 | 218 | 116 | 335 | 226 | 219 |
| 162 | 115 | 307 | 211 | 192 | 115 | 307 | 211 | 192 | 118 | 309 | 214 | 191 |
| 163 | 118 | 318 | 218 | 200 | 118 | 318 | 218 | 200 | 114 | 313 | 214 | 199 |
| 164 | 126 | 296 | 211 | 170 | 127 | 296 | 212 | 169 | 120 | 300 | 210 | 180 |
| 165 | 111 | 273 | 192 | 162 | 111 | 274 | 193 | 163 | 113 | 275 | 194 | 162 |
| 166 | 145 | 273 | 209 | 128 | 146 | 274 | 210 | 128 | 146 | 272 | 209 | 126 |
| 167 | 126 | 305 | 216 | 179 | 127 | 306 | 217 | 179 | 125 | 306 | 216 | 181 |
| 168 | 118 | 327 | 223 | 209 | 118 | 327 | 223 | 209 | 119 | 326 | 223 | 207 |

|     |     |     |     |     |     |     |     |     |     |     |     |     |
|-----|-----|-----|-----|-----|-----|-----|-----|-----|-----|-----|-----|-----|
| 169 | 111 | 273 | 192 | 162 | 112 | 274 | 193 | 162 | 110 | 274 | 192 | 164 |
| 170 | 169 | 226 | 198 | 57  | 169 | 226 | 198 | 57  | 170 | 225 | 198 | 55  |
| 171 | 145 | 273 | 209 | 128 | 145 | 273 | 209 | 128 | 144 | 274 | 209 | 130 |
| 172 | 136 | 293 | 215 | 157 | 136 | 293 | 215 | 157 | 137 | 292 | 215 | 155 |
| 173 | 117 | 325 | 221 | 208 | 117 | 325 | 221 | 208 | 116 | 326 | 221 | 210 |
| 174 | 127 | 303 | 215 | 176 | 127 | 303 | 215 | 176 | 128 | 302 | 215 | 174 |
| 175 | 94  | 273 | 184 | 179 | 94  | 273 | 184 | 179 | 93  | 274 | 184 | 181 |
| 176 | 117 | 325 | 221 | 208 | 117 | 325 | 221 | 208 | 118 | 326 | 222 | 208 |
| 177 | 121 | 325 | 223 | 204 | 121 | 325 | 223 | 204 | 122 | 326 | 224 | 204 |
| 178 | 95  | 273 | 184 | 178 | 95  | 273 | 184 | 178 | 100 | 276 | 188 | 176 |
| 179 | 124 | 307 | 216 | 183 | 124 | 307 | 216 | 183 | 125 | 308 | 217 | 183 |
| 180 | 121 | 316 | 219 | 195 | 121 | 316 | 219 | 195 | 122 | 320 | 221 | 198 |
| 181 | 126 | 273 | 200 | 147 | 126 | 273 | 200 | 147 | 127 | 274 | 201 | 147 |
| 182 | 94  | 332 | 213 | 238 | 94  | 332 | 213 | 238 | 99  | 336 | 218 | 237 |
| 183 | 154 | 233 | 194 | 79  | 154 | 233 | 194 | 79  | 154 | 233 | 194 | 79  |
| 184 | 103 | 273 | 188 | 170 | 102 | 275 | 189 | 173 | 98  | 274 | 186 | 176 |
| 185 | 106 | 326 | 216 | 220 | 105 | 326 | 216 | 221 | 100 | 332 | 216 | 232 |
| 186 | 120 | 330 | 225 | 210 | 123 | 328 | 226 | 205 | 123 | 333 | 228 | 210 |
| 187 | 150 | 248 | 199 | 98  | 150 | 249 | 200 | 99  | 153 | 251 | 202 | 98  |
| 188 | 135 | 273 | 204 | 138 | 136 | 273 | 205 | 137 | 138 | 276 | 207 | 138 |
| 189 | 109 | 329 | 219 | 220 | 109 | 330 | 220 | 221 | 112 | 332 | 222 | 220 |
| 190 | 116 | 332 | 224 | 216 | 120 | 326 | 223 | 206 | 118 | 334 | 226 | 216 |
| 191 | 94  | 280 | 187 | 186 | 95  | 280 | 188 | 185 | 96  | 282 | 189 | 186 |
| 192 | 113 | 273 | 193 | 160 | 113 | 273 | 193 | 160 | 114 | 274 | 194 | 160 |
| 193 | 184 | 242 | 213 | 58  | 184 | 243 | 214 | 59  | 191 | 249 | 220 | 58  |
| 194 | 155 | 259 | 207 | 104 | 155 | 259 | 207 | 104 | 147 | 254 | 201 | 107 |
| 195 | 94  | 273 | 184 | 179 | 94  | 273 | 184 | 179 | 94  | 277 | 186 | 183 |
| 196 | 121 | 333 | 227 | 212 | 121 | 333 | 227 | 212 | 125 | 333 | 229 | 208 |
| 197 | 142 | 271 | 207 | 129 | 143 | 271 | 207 | 128 | 142 | 275 | 209 | 133 |
| 198 | 126 | 314 | 220 | 188 | 126 | 313 | 220 | 187 | 130 | 314 | 222 | 184 |
| 199 | 120 | 306 | 213 | 186 | 120 | 307 | 214 | 187 | 120 | 312 | 216 | 192 |
| 200 | 149 | 286 | 218 | 137 | 149 | 286 | 218 | 137 | 155 | 292 | 224 | 137 |
| 201 | 126 | 288 | 207 | 162 | 126 | 288 | 207 | 162 | 133 | 295 | 214 | 162 |
| 202 | 94  | 273 | 184 | 179 | 94  | 273 | 184 | 179 | 101 | 280 | 191 | 179 |
| 203 | 169 | 236 | 203 | 67  | 169 | 236 | 203 | 67  | 176 | 243 | 210 | 67  |
| 204 | 162 | 252 | 207 | 90  | 163 | 252 | 208 | 89  | 164 | 254 | 209 | 90  |
| 205 | 99  | 273 | 186 | 174 | 99  | 274 | 187 | 175 | 101 | 275 | 188 | 174 |
| 206 | 164 | 278 | 221 | 114 | 165 | 279 | 222 | 114 | 162 | 276 | 219 | 114 |
| 207 | 134 | 272 | 203 | 138 | 135 | 273 | 204 | 138 | 132 | 270 | 201 | 138 |
| 208 | 153 | 302 | 228 | 149 | 153 | 302 | 228 | 149 | 151 | 300 | 226 | 149 |
| 209 | 94  | 273 | 184 | 179 | 95  | 274 | 185 | 179 | 92  | 271 | 182 | 179 |
| 210 | 154 | 273 | 214 | 119 | 154 | 273 | 214 | 119 | 152 | 271 | 212 | 119 |
| 211 | 94  | 331 | 213 | 237 | 94  | 331 | 213 | 237 | 92  | 329 | 211 | 237 |
| 212 | 114 | 273 | 194 | 159 | 114 | 273 | 194 | 159 | 112 | 271 | 192 | 159 |
| 213 | 139 | 267 | 203 | 128 | 139 | 267 | 203 | 128 | 137 | 265 | 201 | 128 |
| 214 | 94  | 273 | 184 | 179 | 94  | 273 | 184 | 179 | 92  | 271 | 182 | 179 |
| 215 | 136 | 324 | 230 | 188 | 136 | 324 | 230 | 188 | 134 | 322 | 228 | 188 |
| 216 | 114 | 273 | 194 | 159 | 114 | 273 | 194 | 159 | 114 | 273 | 194 | 159 |
| 217 | 94  | 333 | 214 | 239 | 95  | 335 | 215 | 240 | 94  | 333 | 214 | 239 |
| 218 | 94  | 333 | 214 | 239 | 95  | 333 | 214 | 238 | 96  | 336 | 216 | 240 |
| 219 | 154 | 333 | 244 | 179 | 157 | 335 | 246 | 178 | 157 | 335 | 246 | 178 |
| 220 | 102 | 328 | 215 | 226 | 102 | 329 | 216 | 227 | 98  | 323 | 211 | 225 |
| 221 | 94  | 333 | 214 | 239 | 95  | 333 | 214 | 238 | 88  | 337 | 213 | 249 |
| 222 | 94  | 331 | 213 | 237 | 94  | 332 | 213 | 238 | 96  | 333 | 215 | 237 |



|     |     |     |     |     |     |     |     |     |     |     |     |     |
|-----|-----|-----|-----|-----|-----|-----|-----|-----|-----|-----|-----|-----|
| 223 | 94  | 273 | 184 | 179 | 98  | 274 | 186 | 176 | 95  | 272 | 184 | 177 |
| 224 | 114 | 273 | 194 | 159 | 115 | 273 | 194 | 158 | 113 | 274 | 194 | 161 |
| 225 | 136 | 307 | 222 | 171 | 136 | 307 | 222 | 171 | 137 | 306 | 222 | 169 |
| 226 | 122 | 306 | 214 | 184 | 122 | 307 | 215 | 185 | 121 | 307 | 214 | 186 |
| 227 | 115 | 328 | 222 | 213 | 115 | 328 | 222 | 213 | 116 | 327 | 222 | 211 |
| 228 | 123 | 333 | 228 | 210 | 123 | 333 | 228 | 210 | 122 | 334 | 228 | 212 |
| 229 | 94  | 333 | 214 | 239 | 94  | 333 | 214 | 239 | 95  | 332 | 214 | 237 |
| 230 | 119 | 213 | 166 | 94  | 120 | 213 | 167 | 93  | 118 | 214 | 166 | 96  |
| 231 | 94  | 333 | 214 | 239 | 94  | 333 | 214 | 239 | 95  | 332 | 214 | 237 |
| 232 | 129 | 314 | 222 | 185 | 129 | 315 | 222 | 186 | 128 | 315 | 222 | 187 |
| 233 | 94  | 273 | 184 | 179 | 94  | 273 | 184 | 179 | 95  | 274 | 185 | 179 |
| 234 | 187 | 193 | 190 | 6   | 187 | 193 | 190 | 6   | 188 | 194 | 191 | 6   |
| 235 | 131 | 273 | 202 | 142 | 131 | 273 | 202 | 142 | 136 | 276 | 206 | 140 |
| 236 | 94  | 333 | 214 | 239 | 94  | 333 | 214 | 239 | 95  | 334 | 215 | 239 |
| 237 | 94  | 273 | 184 | 179 | 95  | 273 | 184 | 178 | 95  | 277 | 186 | 182 |
| 238 | 174 | 273 | 224 | 99  | 174 | 274 | 224 | 100 | 175 | 274 | 225 | 99  |
| 239 | 94  | 333 | 214 | 239 | 95  | 334 | 215 | 239 | 99  | 337 | 218 | 238 |
| 240 | 94  | 273 | 184 | 179 | 95  | 274 | 185 | 179 | 94  | 273 | 184 | 179 |
| 241 | 158 | 279 | 219 | 121 | 158 | 279 | 219 | 121 | 153 | 280 | 217 | 127 |
| 242 | 101 | 273 | 187 | 172 | 102 | 274 | 188 | 172 | 95  | 279 | 187 | 184 |
| 243 | 125 | 315 | 220 | 190 | 126 | 317 | 222 | 191 | 128 | 318 | 223 | 190 |
| 244 | 94  | 333 | 214 | 239 | 95  | 333 | 214 | 238 | 97  | 336 | 217 | 239 |
| 245 | 134 | 271 | 203 | 137 | 137 | 273 | 205 | 136 | 137 | 274 | 206 | 137 |
| 246 | 177 | 242 | 210 | 65  | 177 | 243 | 210 | 66  | 180 | 245 | 213 | 65  |
| 247 | 128 | 273 | 201 | 145 | 129 | 273 | 201 | 144 | 130 | 275 | 203 | 145 |
| 248 | 127 | 273 | 200 | 146 | 127 | 274 | 201 | 147 | 129 | 275 | 202 | 146 |
| 249 | 127 | 333 | 230 | 206 | 131 | 334 | 233 | 203 | 128 | 334 | 231 | 206 |
| 250 | 113 | 327 | 220 | 214 | 114 | 327 | 221 | 213 | 120 | 334 | 227 | 214 |
| 251 | 96  | 329 | 213 | 233 | 96  | 329 | 213 | 233 | 88  | 324 | 206 | 236 |
| 252 | 165 | 253 | 209 | 88  | 165 | 254 | 210 | 89  | 165 | 257 | 211 | 92  |
| 253 | 135 | 273 | 204 | 138 | 135 | 273 | 204 | 138 | 139 | 273 | 206 | 134 |
| 254 | 94  | 332 | 213 | 238 | 94  | 332 | 213 | 238 | 94  | 336 | 215 | 242 |
| 255 | 147 | 266 | 207 | 119 | 147 | 266 | 207 | 119 | 151 | 266 | 209 | 115 |
| 256 | 94  | 329 | 212 | 235 | 95  | 329 | 212 | 234 | 94  | 335 | 215 | 241 |
| 257 | 119 | 273 | 196 | 154 | 119 | 273 | 196 | 154 | 125 | 279 | 202 | 154 |
| 258 | 114 | 303 | 209 | 189 | 114 | 304 | 209 | 190 | 121 | 310 | 216 | 189 |
| 259 | 127 | 293 | 210 | 166 | 127 | 293 | 210 | 166 | 134 | 300 | 217 | 166 |
| 260 | 139 | 280 | 210 | 141 | 139 | 280 | 210 | 141 | 146 | 287 | 217 | 141 |
| 261 | 94  | 327 | 211 | 233 | 94  | 327 | 211 | 233 | 96  | 329 | 213 | 233 |
| 262 | 107 | 273 | 190 | 166 | 107 | 273 | 190 | 166 | 109 | 275 | 192 | 166 |
| 263 | 134 | 273 | 204 | 139 | 135 | 273 | 204 | 138 | 132 | 271 | 202 | 139 |
| 264 | 114 | 332 | 223 | 218 | 114 | 333 | 224 | 219 | 112 | 330 | 221 | 218 |
| 265 | 112 | 322 | 217 | 210 | 111 | 323 | 217 | 212 | 110 | 320 | 215 | 210 |
| 266 | 114 | 333 | 224 | 219 | 113 | 334 | 224 | 221 | 112 | 331 | 222 | 219 |
| 267 | 151 | 265 | 208 | 114 | 151 | 265 | 208 | 114 | 149 | 263 | 206 | 114 |
| 268 | 101 | 273 | 187 | 172 | 102 | 274 | 188 | 172 | 99  | 271 | 185 | 172 |
| 269 | 130 | 333 | 232 | 203 | 131 | 334 | 233 | 203 | 128 | 331 | 230 | 203 |
| 270 | 136 | 213 | 175 | 77  | 137 | 214 | 176 | 77  | 134 | 211 | 173 | 77  |
| 271 | 149 | 292 | 221 | 143 | 148 | 293 | 221 | 145 | 147 | 290 | 219 | 143 |
| 272 | 145 | 270 | 208 | 125 | 144 | 271 | 208 | 127 | 143 | 268 | 206 | 125 |
| 273 | 137 | 273 | 205 | 136 | 136 | 274 | 205 | 138 | 137 | 273 | 205 | 136 |
| 274 | 122 | 320 | 221 | 198 | 121 | 321 | 221 | 200 | 122 | 320 | 221 | 198 |
| 275 | 112 | 322 | 217 | 210 | 111 | 323 | 217 | 212 | 112 | 322 | 217 | 210 |
| 276 | 141 | 265 | 203 | 124 | 140 | 266 | 203 | 126 | 141 | 265 | 203 | 124 |

|     |     |     |     |     |     |     |     |     |     |     |     |     |
|-----|-----|-----|-----|-----|-----|-----|-----|-----|-----|-----|-----|-----|
| 277 | 112 | 322 | 217 | 210 | 111 | 323 | 217 | 212 | 112 | 322 | 217 | 210 |
| 278 | 174 | 273 | 224 | 99  | 173 | 274 | 224 | 101 | 174 | 273 | 224 | 99  |
| 279 | 124 | 322 | 223 | 198 | 123 | 323 | 223 | 200 | 126 | 325 | 226 | 199 |
| 280 | 94  | 326 | 210 | 232 | 93  | 327 | 210 | 234 | 97  | 328 | 213 | 231 |
| 281 | 143 | 285 | 214 | 142 | 144 | 284 | 214 | 140 | 139 | 280 | 210 | 141 |
| 282 | 133 | 282 | 208 | 149 | 134 | 281 | 208 | 147 | 127 | 286 | 207 | 159 |
| 283 | 174 | 253 | 214 | 79  | 175 | 252 | 214 | 77  | 176 | 255 | 216 | 79  |
| 284 | 110 | 329 | 220 | 219 | 111 | 328 | 220 | 217 | 111 | 328 | 220 | 217 |
| 285 | 144 | 303 | 224 | 159 | 145 | 302 | 224 | 157 | 143 | 304 | 224 | 161 |
| 286 | 114 | 333 | 224 | 219 | 115 | 332 | 224 | 217 | 115 | 332 | 224 | 217 |
| 287 | 159 | 274 | 217 | 115 | 160 | 273 | 217 | 113 | 158 | 275 | 217 | 117 |
| 288 | 152 | 287 | 220 | 135 | 153 | 286 | 220 | 133 | 153 | 286 | 220 | 133 |
| 289 | 117 | 331 | 224 | 214 | 118 | 330 | 224 | 212 | 116 | 332 | 224 | 216 |
| 290 | 109 | 333 | 221 | 224 | 110 | 332 | 221 | 222 | 110 | 332 | 221 | 222 |
| 291 | 94  | 273 | 184 | 179 | 95  | 274 | 185 | 179 | 93  | 274 | 184 | 181 |
| 292 | 94  | 332 | 213 | 238 | 95  | 333 | 214 | 238 | 95  | 331 | 213 | 236 |
| 293 | 112 | 322 | 217 | 210 | 111 | 321 | 216 | 210 | 111 | 323 | 217 | 212 |
| 294 | 168 | 241 | 205 | 73  | 167 | 240 | 204 | 73  | 169 | 242 | 206 | 73  |
| 295 | 122 | 317 | 220 | 195 | 121 | 316 | 219 | 195 | 123 | 318 | 221 | 195 |
| 296 | 94  | 273 | 184 | 179 | 93  | 272 | 183 | 179 | 99  | 276 | 188 | 177 |
| 297 | 119 | 273 | 196 | 154 | 118 | 272 | 195 | 154 | 120 | 274 | 197 | 154 |
| 298 | 145 | 319 | 232 | 174 | 144 | 318 | 231 | 174 | 146 | 323 | 235 | 177 |
| 299 | 114 | 333 | 224 | 219 | 113 | 332 | 223 | 219 | 115 | 334 | 225 | 219 |
| 300 | 98  | 329 | 214 | 231 | 97  | 328 | 213 | 231 | 103 | 333 | 218 | 230 |
| 301 | 94  | 328 | 211 | 234 | 93  | 327 | 210 | 234 | 94  | 328 | 211 | 234 |
| 302 | 112 | 322 | 217 | 210 | 113 | 323 | 218 | 210 | 107 | 323 | 215 | 216 |
| 303 | 94  | 328 | 211 | 234 | 95  | 329 | 212 | 234 | 88  | 334 | 211 | 246 |
| 304 | 103 | 330 | 217 | 227 | 104 | 331 | 218 | 227 | 106 | 333 | 220 | 227 |
| 305 | 100 | 333 | 217 | 233 | 101 | 334 | 218 | 233 | 103 | 336 | 220 | 233 |
| 306 | 94  | 332 | 213 | 238 | 95  | 333 | 214 | 238 | 97  | 335 | 216 | 238 |
| 307 | 94  | 273 | 184 | 179 | 95  | 274 | 185 | 179 | 97  | 276 | 187 | 179 |
| 308 | 94  | 273 | 184 | 179 | 95  | 274 | 185 | 179 | 96  | 275 | 186 | 179 |
| 309 | 172 | 331 | 252 | 159 | 171 | 330 | 251 | 159 | 174 | 333 | 254 | 159 |
| 310 | 94  | 329 | 212 | 235 | 93  | 328 | 211 | 235 | 95  | 330 | 213 | 235 |
| 311 | 94  | 273 | 184 | 179 | 93  | 272 | 183 | 179 | 101 | 280 | 191 | 179 |
| 312 | 147 | 244 | 196 | 97  | 146 | 243 | 195 | 97  | 139 | 239 | 189 | 100 |
| 313 | 94  | 273 | 184 | 179 | 93  | 272 | 183 | 179 | 94  | 277 | 186 | 183 |
| 314 | 126 | 331 | 229 | 205 | 125 | 330 | 228 | 205 | 130 | 331 | 231 | 201 |
| 315 | 150 | 256 | 203 | 106 | 149 | 255 | 202 | 106 | 150 | 260 | 205 | 110 |
| 316 | 112 | 322 | 217 | 210 | 111 | 321 | 216 | 210 | 116 | 322 | 219 | 206 |
| 317 | 141 | 280 | 211 | 139 | 140 | 279 | 210 | 139 | 141 | 286 | 214 | 145 |
| 318 | 94  | 327 | 211 | 233 | 95  | 328 | 212 | 233 | 100 | 333 | 217 | 233 |
| 319 | 141 | 233 | 187 | 92  | 142 | 234 | 188 | 92  | 148 | 240 | 194 | 92  |
| 320 | 143 | 260 | 202 | 117 | 144 | 261 | 203 | 117 | 150 | 267 | 209 | 117 |
| 321 | 174 | 273 | 224 | 99  | 175 | 274 | 225 | 99  | 181 | 280 | 231 | 99  |
| 322 | 112 | 322 | 217 | 210 | 113 | 323 | 218 | 210 | 114 | 324 | 219 | 210 |
| 323 | 94  | 273 | 184 | 179 | 95  | 274 | 185 | 179 | 96  | 275 | 186 | 179 |
| 324 | 135 | 333 | 234 | 198 | 136 | 334 | 235 | 198 | 133 | 331 | 232 | 198 |
| 325 | 121 | 330 | 226 | 209 | 122 | 331 | 227 | 209 | 119 | 328 | 224 | 209 |
| 326 | 129 | 298 | 214 | 169 | 130 | 299 | 215 | 169 | 127 | 296 | 212 | 169 |
| 327 | 164 | 188 | 176 | 24  | 165 | 189 | 177 | 24  | 162 | 186 | 174 | 24  |
| 328 | 111 | 273 | 192 | 162 | 112 | 274 | 193 | 162 | 109 | 271 | 190 | 162 |
| 329 | 154 | 193 | 174 | 39  | 155 | 194 | 175 | 39  | 152 | 191 | 172 | 39  |
| 330 | 149 | 296 | 223 | 147 | 150 | 297 | 224 | 147 | 147 | 294 | 221 | 147 |

|     |     |     |     |     |     |     |     |     |     |     |     |     |
|-----|-----|-----|-----|-----|-----|-----|-----|-----|-----|-----|-----|-----|
| 331 | 142 | 300 | 221 | 158 | 143 | 301 | 222 | 158 | 140 | 298 | 219 | 158 |
| 332 | 102 | 273 | 188 | 171 | 103 | 274 | 189 | 171 | 100 | 271 | 186 | 171 |
| 333 | 124 | 313 | 219 | 189 | 125 | 314 | 220 | 189 | 122 | 311 | 217 | 189 |
| 334 | 112 | 322 | 217 | 210 | 113 | 323 | 218 | 210 | 112 | 322 | 217 | 210 |
| 335 | 123 | 318 | 221 | 195 | 124 | 319 | 222 | 195 | 123 | 318 | 221 | 195 |
| 336 | 117 | 313 | 215 | 196 | 118 | 314 | 216 | 196 | 118 | 313 | 216 | 195 |
| 337 | 98  | 273 | 186 | 175 | 99  | 274 | 187 | 175 | 98  | 273 | 186 | 175 |
| 338 | 165 | 246 | 206 | 81  | 166 | 247 | 207 | 81  | 165 | 246 | 206 | 81  |
| 339 | 94  | 273 | 184 | 179 | 95  | 274 | 185 | 179 | 94  | 274 | 184 | 180 |
| 340 | 94  | 331 | 213 | 237 | 95  | 332 | 214 | 237 | 94  | 331 | 213 | 237 |
| 341 | 94  | 330 | 212 | 236 | 95  | 331 | 213 | 236 | 95  | 330 | 213 | 235 |
| 342 | 109 | 327 | 218 | 218 | 110 | 328 | 219 | 218 | 109 | 327 | 218 | 218 |
| 343 | 175 | 248 | 212 | 73  | 176 | 249 | 213 | 73  | 175 | 248 | 212 | 73  |
| 344 | 94  | 332 | 213 | 238 | 95  | 333 | 214 | 238 | 95  | 332 | 214 | 237 |
| 345 | 154 | 328 | 241 | 174 | 155 | 329 | 242 | 174 | 154 | 328 | 241 | 174 |
| 346 | 110 | 273 | 192 | 163 | 111 | 274 | 193 | 163 | 110 | 273 | 192 | 163 |
| 347 | 170 | 268 | 219 | 98  | 171 | 269 | 220 | 98  | 170 | 269 | 220 | 99  |
| 348 | 121 | 315 | 218 | 194 | 122 | 316 | 219 | 194 | 121 | 315 | 218 | 194 |
| 349 | 145 | 303 | 224 | 158 | 146 | 304 | 225 | 158 | 146 | 303 | 225 | 157 |
| 350 | 132 | 273 | 203 | 141 | 133 | 274 | 204 | 141 | 132 | 274 | 203 | 142 |
| 351 | 94  | 233 | 164 | 139 | 95  | 234 | 165 | 139 | 94  | 233 | 164 | 139 |
| 352 | 135 | 273 | 204 | 138 | 136 | 274 | 205 | 138 | 137 | 276 | 207 | 139 |
| 353 | 122 | 273 | 198 | 151 | 123 | 274 | 199 | 151 | 125 | 275 | 200 | 150 |
| 354 | 182 | 204 | 193 | 22  | 183 | 205 | 194 | 22  | 178 | 199 | 189 | 21  |
| 355 | 112 | 322 | 217 | 210 | 113 | 323 | 218 | 210 | 106 | 326 | 216 | 220 |
| 356 | 170 | 250 | 210 | 80  | 171 | 251 | 211 | 80  | 172 | 252 | 212 | 80  |
| 357 | 98  | 323 | 211 | 225 | 99  | 324 | 212 | 225 | 99  | 322 | 211 | 223 |
| 358 | 109 | 333 | 221 | 224 | 110 | 334 | 222 | 224 | 108 | 334 | 221 | 226 |
| 359 | 94  | 331 | 213 | 237 | 95  | 332 | 214 | 237 | 95  | 330 | 213 | 235 |
| 360 | 128 | 298 | 213 | 170 | 129 | 299 | 214 | 170 | 127 | 299 | 213 | 172 |
| 361 | 137 | 253 | 195 | 116 | 137 | 253 | 195 | 116 | 138 | 252 | 195 | 114 |
| 362 | 114 | 315 | 215 | 201 | 114 | 315 | 215 | 201 | 113 | 316 | 215 | 203 |
| 363 | 114 | 333 | 224 | 219 | 114 | 333 | 224 | 219 | 115 | 332 | 224 | 217 |
| 364 | 112 | 322 | 217 | 210 | 112 | 322 | 217 | 210 | 111 | 323 | 217 | 212 |
| 365 | 163 | 250 | 207 | 87  | 163 | 250 | 207 | 87  | 164 | 249 | 207 | 85  |
| 366 | 107 | 330 | 219 | 223 | 107 | 330 | 219 | 223 | 106 | 331 | 219 | 225 |
| 367 | 129 | 333 | 231 | 204 | 129 | 333 | 231 | 204 | 130 | 334 | 232 | 204 |
| 368 | 126 | 332 | 229 | 206 | 126 | 332 | 229 | 206 | 127 | 333 | 230 | 206 |
| 369 | 94  | 273 | 184 | 179 | 94  | 273 | 184 | 179 | 99  | 276 | 188 | 177 |
| 370 | 122 | 273 | 198 | 151 | 122 | 273 | 198 | 151 | 123 | 274 | 199 | 151 |
| 371 | 139 | 218 | 179 | 79  | 140 | 219 | 180 | 79  | 140 | 222 | 181 | 82  |
| 372 | 101 | 332 | 217 | 231 | 102 | 333 | 218 | 231 | 102 | 333 | 218 | 231 |
| 373 | 177 | 248 | 213 | 71  | 178 | 249 | 214 | 71  | 182 | 252 | 217 | 70  |
| 374 | 94  | 310 | 202 | 216 | 95  | 311 | 203 | 216 | 94  | 310 | 202 | 216 |
| 375 | 94  | 333 | 214 | 239 | 95  | 334 | 215 | 239 | 89  | 334 | 212 | 245 |
| 376 | 155 | 246 | 201 | 91  | 156 | 247 | 202 | 91  | 149 | 252 | 201 | 103 |
| 377 | 94  | 329 | 212 | 235 | 95  | 330 | 213 | 235 | 97  | 332 | 215 | 235 |
| 378 | 114 | 326 | 220 | 212 | 115 | 327 | 221 | 212 | 117 | 329 | 223 | 212 |
| 379 | 94  | 326 | 210 | 232 | 95  | 327 | 211 | 232 | 97  | 329 | 213 | 232 |
| 380 | 94  | 331 | 213 | 237 | 95  | 332 | 214 | 237 | 97  | 334 | 216 | 237 |
| 381 | 122 | 273 | 198 | 151 | 123 | 274 | 199 | 151 | 124 | 275 | 200 | 151 |
| 382 | 115 | 331 | 223 | 216 | 116 | 332 | 224 | 216 | 117 | 333 | 225 | 216 |
| 383 | 105 | 253 | 179 | 148 | 106 | 254 | 180 | 148 | 106 | 254 | 180 | 148 |
| 384 | 147 | 281 | 214 | 134 | 148 | 282 | 215 | 134 | 154 | 288 | 221 | 134 |

|     |     |     |     |     |     |     |     |     |     |     |     |     |
|-----|-----|-----|-----|-----|-----|-----|-----|-----|-----|-----|-----|-----|
| 385 | 112 | 322 | 217 | 210 | 113 | 323 | 218 | 210 | 104 | 317 | 211 | 213 |
| 386 | 142 | 293 | 218 | 151 | 143 | 294 | 219 | 151 | 142 | 297 | 220 | 155 |
| 387 | 94  | 273 | 184 | 179 | 95  | 274 | 185 | 179 | 98  | 273 | 186 | 175 |
| 388 | 109 | 270 | 190 | 161 | 110 | 271 | 191 | 161 | 109 | 274 | 192 | 165 |
| 389 | 94  | 273 | 184 | 179 | 95  | 274 | 185 | 179 | 98  | 273 | 186 | 175 |
| 390 | 103 | 333 | 218 | 230 | 104 | 334 | 219 | 230 | 103 | 339 | 221 | 236 |
| 391 | 117 | 273 | 195 | 156 | 118 | 274 | 196 | 156 | 123 | 279 | 201 | 156 |
| 392 | 162 | 319 | 241 | 157 | 163 | 320 | 242 | 157 | 169 | 326 | 248 | 157 |
| 393 | 94  | 321 | 208 | 227 | 95  | 322 | 209 | 227 | 101 | 328 | 215 | 227 |
| 394 | 94  | 273 | 184 | 179 | 95  | 274 | 185 | 179 | 101 | 280 | 191 | 179 |
| 395 | 153 | 250 | 202 | 97  | 154 | 251 | 203 | 97  | 155 | 252 | 204 | 97  |
| 396 | 143 | 256 | 200 | 113 | 144 | 257 | 201 | 113 | 145 | 258 | 202 | 113 |
| 397 | 130 | 322 | 226 | 192 | 131 | 323 | 227 | 192 | 128 | 320 | 224 | 192 |
| 398 | 162 | 319 | 241 | 157 | 161 | 318 | 240 | 157 | 160 | 317 | 239 | 157 |
| 399 | 114 | 333 | 224 | 219 | 113 | 332 | 223 | 219 | 112 | 331 | 222 | 219 |
| 400 | 119 | 273 | 196 | 154 | 118 | 272 | 195 | 154 | 117 | 271 | 194 | 154 |
| 401 | 94  | 273 | 184 | 179 | 93  | 272 | 183 | 179 | 92  | 271 | 182 | 179 |
| 402 | 125 | 299 | 212 | 174 | 124 | 298 | 211 | 174 | 123 | 297 | 210 | 174 |
| 403 | 162 | 319 | 241 | 157 | 161 | 318 | 240 | 157 | 160 | 317 | 239 | 157 |
| 404 | 129 | 333 | 231 | 204 | 128 | 332 | 230 | 204 | 127 | 331 | 229 | 204 |
| 405 | 108 | 333 | 221 | 225 | 107 | 332 | 220 | 225 | 106 | 331 | 219 | 225 |
| 406 | 129 | 333 | 231 | 204 | 128 | 332 | 230 | 204 | 127 | 331 | 229 | 204 |
| 407 | 94  | 330 | 212 | 236 | 93  | 329 | 211 | 236 | 95  | 330 | 213 | 235 |
| 408 | 143 | 256 | 200 | 113 | 142 | 255 | 199 | 113 | 144 | 256 | 200 | 112 |
| 409 | 159 | 301 | 230 | 142 | 158 | 300 | 229 | 142 | 160 | 302 | 231 | 142 |
| 410 | 162 | 319 | 241 | 157 | 161 | 318 | 240 | 157 | 163 | 319 | 241 | 156 |
| 411 | 94  | 331 | 213 | 237 | 93  | 330 | 212 | 237 | 95  | 332 | 214 | 237 |
| 412 | 94  | 331 | 213 | 237 | 93  | 330 | 212 | 237 | 99  | 335 | 217 | 236 |
| 413 | 134 | 273 | 204 | 139 | 133 | 272 | 203 | 139 | 135 | 274 | 205 | 139 |
| 414 | 114 | 333 | 224 | 219 | 113 | 332 | 223 | 219 | 116 | 336 | 226 | 220 |
| 415 | 129 | 213 | 171 | 84  | 128 | 212 | 170 | 84  | 132 | 215 | 174 | 83  |
| 416 | 106 | 305 | 206 | 199 | 107 | 306 | 207 | 199 | 102 | 300 | 201 | 198 |
| 417 | 100 | 333 | 217 | 233 | 101 | 334 | 218 | 233 | 94  | 337 | 216 | 243 |
| 418 | 252 | 281 | 267 | 29  | 253 | 282 | 268 | 29  | 254 | 283 | 269 | 29  |
| 419 | 114 | 253 | 184 | 139 | 115 | 254 | 185 | 139 | 115 | 252 | 184 | 137 |
| 420 | 135 | 273 | 204 | 138 | 136 | 274 | 205 | 138 | 134 | 274 | 204 | 140 |
| 421 | 94  | 321 | 208 | 227 | 95  | 322 | 209 | 227 | 95  | 320 | 208 | 225 |
| 422 | 94  | 333 | 214 | 239 | 95  | 334 | 215 | 239 | 93  | 334 | 214 | 241 |
| 423 | 135 | 273 | 204 | 138 | 136 | 274 | 205 | 138 | 136 | 272 | 204 | 136 |
| 424 | 176 | 209 | 193 | 33  | 177 | 210 | 194 | 33  | 175 | 210 | 193 | 35  |
| 425 | 139 | 278 | 209 | 139 | 140 | 279 | 210 | 139 | 140 | 277 | 209 | 137 |
| 426 | 174 | 281 | 228 | 107 | 175 | 282 | 229 | 107 | 173 | 282 | 228 | 109 |
| 427 | 94  | 273 | 184 | 179 | 95  | 274 | 185 | 179 | 95  | 272 | 184 | 177 |
| 428 | 125 | 328 | 227 | 203 | 126 | 329 | 228 | 203 | 124 | 329 | 227 | 205 |
| 429 | 103 | 273 | 188 | 170 | 104 | 274 | 189 | 170 | 104 | 274 | 189 | 170 |
| 430 | 259 | 333 | 296 | 74  | 260 | 334 | 297 | 74  | 260 | 334 | 297 | 74  |
| 431 | 105 | 325 | 215 | 220 | 106 | 326 | 216 | 220 | 110 | 328 | 219 | 218 |
| 432 | 151 | 253 | 202 | 102 | 152 | 254 | 203 | 102 | 152 | 254 | 203 | 102 |
| 433 | 114 | 332 | 223 | 218 | 115 | 333 | 224 | 218 | 115 | 336 | 226 | 221 |
| 434 | 174 | 281 | 228 | 107 | 175 | 282 | 229 | 107 | 175 | 282 | 229 | 107 |
| 435 | 94  | 273 | 184 | 179 | 95  | 274 | 185 | 179 | 99  | 277 | 188 | 178 |
| 436 | 125 | 328 | 227 | 203 | 126 | 329 | 228 | 203 | 125 | 328 | 227 | 203 |
| 437 | 145 | 235 | 190 | 90  | 146 | 236 | 191 | 90  | 140 | 236 | 188 | 96  |
| 438 | 259 | 333 | 296 | 74  | 260 | 334 | 297 | 74  | 253 | 339 | 296 | 86  |

|     |     |     |     |     |     |     |     |     |     |     |     |     |
|-----|-----|-----|-----|-----|-----|-----|-----|-----|-----|-----|-----|-----|
| 439 | 117 | 321 | 219 | 204 | 118 | 322 | 220 | 204 | 120 | 324 | 222 | 204 |
| 440 | 165 | 243 | 204 | 78  | 166 | 244 | 205 | 78  | 168 | 246 | 207 | 78  |
| 441 | 114 | 319 | 217 | 205 | 115 | 320 | 218 | 205 | 117 | 322 | 220 | 205 |
| 442 | 97  | 273 | 185 | 176 | 98  | 274 | 186 | 176 | 100 | 276 | 188 | 176 |
| 443 | 165 | 243 | 204 | 78  | 166 | 244 | 205 | 78  | 167 | 245 | 206 | 78  |
| 444 | 132 | 333 | 233 | 201 | 133 | 334 | 234 | 201 | 134 | 335 | 235 | 201 |
| 445 | 174 | 325 | 250 | 151 | 175 | 326 | 251 | 151 | 175 | 326 | 251 | 151 |
| 446 | 94  | 331 | 213 | 237 | 95  | 332 | 214 | 237 | 101 | 338 | 220 | 237 |
| 447 | 114 | 333 | 224 | 219 | 115 | 334 | 225 | 219 | 106 | 328 | 217 | 222 |
| 448 | 94  | 327 | 211 | 233 | 95  | 328 | 212 | 233 | 94  | 331 | 213 | 237 |
| 449 | 94  | 333 | 214 | 239 | 95  | 334 | 215 | 239 | 98  | 333 | 216 | 235 |
| 450 | 174 | 325 | 250 | 151 | 175 | 326 | 251 | 151 | 174 | 329 | 252 | 155 |
| 451 | 94  | 333 | 214 | 239 | 95  | 334 | 215 | 239 | 98  | 333 | 216 | 235 |
| 452 | 134 | 306 | 220 | 172 | 135 | 307 | 221 | 172 | 134 | 312 | 223 | 178 |
| 453 | 114 | 333 | 224 | 219 | 115 | 334 | 225 | 219 | 120 | 339 | 230 | 219 |
| 454 | 105 | 304 | 205 | 199 | 106 | 305 | 206 | 199 | 112 | 311 | 212 | 199 |
| 455 | 94  | 330 | 212 | 236 | 95  | 331 | 213 | 236 | 101 | 337 | 219 | 236 |
| 456 | 126 | 253 | 190 | 127 | 127 | 254 | 191 | 127 | 133 | 260 | 197 | 127 |
| 457 | 155 | 292 | 224 | 137 | 156 | 293 | 225 | 137 | 157 | 294 | 226 | 137 |
| 458 | 94  | 331 | 213 | 237 | 95  | 332 | 214 | 237 | 96  | 333 | 215 | 237 |
| 459 | 174 | 253 | 214 | 79  | 175 | 254 | 215 | 79  | 172 | 251 | 212 | 79  |
| 460 | 119 | 327 | 223 | 208 | 120 | 328 | 224 | 208 | 117 | 325 | 221 | 208 |
| 461 | 132 | 300 | 216 | 168 | 133 | 301 | 217 | 168 | 130 | 298 | 214 | 168 |
| 462 | 159 | 273 | 216 | 114 | 160 | 274 | 217 | 114 | 157 | 271 | 214 | 114 |
| 463 | 110 | 273 | 192 | 163 | 111 | 274 | 193 | 163 | 108 | 271 | 190 | 163 |
| 464 | 150 | 273 | 212 | 123 | 150 | 273 | 212 | 123 | 148 | 271 | 210 | 123 |
| 465 | 184 | 243 | 214 | 59  | 184 | 243 | 214 | 59  | 182 | 241 | 212 | 59  |
| 466 | 174 | 253 | 214 | 79  | 174 | 253 | 214 | 79  | 172 | 251 | 212 | 79  |
| 467 | 94  | 333 | 214 | 239 | 94  | 333 | 214 | 239 | 92  | 331 | 212 | 239 |
| 468 | 101 | 264 | 183 | 163 | 101 | 264 | 183 | 163 | 99  | 262 | 181 | 163 |
| 469 | 153 | 239 | 196 | 86  | 153 | 239 | 196 | 86  | 151 | 237 | 194 | 86  |
| 470 | 139 | 270 | 205 | 131 | 139 | 270 | 205 | 131 | 137 | 268 | 203 | 131 |
| 471 | 106 | 273 | 190 | 167 | 106 | 273 | 190 | 167 | 104 | 271 | 188 | 167 |
| 472 | 130 | 290 | 210 | 160 | 130 | 290 | 210 | 160 | 128 | 288 | 208 | 160 |
| 473 | 264 | 333 | 299 | 69  | 264 | 333 | 299 | 69  | 262 | 331 | 297 | 69  |
| 474 | 148 | 221 | 185 | 73  | 148 | 221 | 185 | 73  | 146 | 219 | 183 | 73  |
| 475 | 125 | 303 | 214 | 178 | 125 | 303 | 214 | 178 | 123 | 301 | 212 | 178 |
| 476 | 119 | 299 | 209 | 180 | 119 | 299 | 209 | 180 | 117 | 297 | 207 | 180 |
| 477 | 101 | 264 | 183 | 163 | 101 | 264 | 183 | 163 | 99  | 262 | 181 | 163 |
| 478 | 135 | 253 | 194 | 118 | 135 | 253 | 194 | 118 | 133 | 251 | 192 | 118 |
| 479 | 94  | 312 | 203 | 218 | 94  | 312 | 203 | 218 | 92  | 310 | 201 | 218 |
| 480 | 114 | 329 | 222 | 215 | 114 | 329 | 222 | 215 | 112 | 327 | 220 | 215 |
| 481 | 114 | 333 | 224 | 219 | 114 | 333 | 224 | 219 | 112 | 331 | 222 | 219 |
| 482 | 105 | 330 | 218 | 225 | 105 | 330 | 218 | 225 | 103 | 328 | 216 | 225 |
| 483 | 108 | 331 | 220 | 223 | 108 | 331 | 220 | 223 | 106 | 329 | 218 | 223 |
| 484 | 118 | 333 | 226 | 215 | 118 | 333 | 226 | 215 | 116 | 331 | 224 | 215 |
| 485 | 94  | 273 | 184 | 179 | 94  | 273 | 184 | 179 | 92  | 271 | 182 | 179 |
| 486 | 94  | 331 | 213 | 237 | 94  | 331 | 213 | 237 | 92  | 329 | 211 | 237 |
| 487 | 132 | 273 | 203 | 141 | 133 | 274 | 204 | 141 | 130 | 271 | 201 | 141 |
| 488 | 131 | 276 | 204 | 145 | 132 | 277 | 205 | 145 | 129 | 274 | 202 | 145 |
| 489 | 103 | 331 | 217 | 228 | 104 | 332 | 218 | 228 | 101 | 329 | 215 | 228 |
| 490 | 94  | 309 | 202 | 215 | 95  | 310 | 203 | 215 | 92  | 307 | 200 | 215 |
| 491 | 145 | 263 | 204 | 118 | 146 | 264 | 205 | 118 | 143 | 261 | 202 | 118 |
| 492 | 162 | 254 | 208 | 92  | 163 | 255 | 209 | 92  | 160 | 252 | 206 | 92  |

|     |     |     |     |     |     |     |     |     |     |     |     |     |
|-----|-----|-----|-----|-----|-----|-----|-----|-----|-----|-----|-----|-----|
| 493 | 113 | 233 | 173 | 120 | 114 | 234 | 174 | 120 | 111 | 231 | 171 | 120 |
| 494 | 98  | 329 | 214 | 231 | 99  | 330 | 215 | 231 | 96  | 327 | 212 | 231 |
| 495 | 98  | 327 | 213 | 229 | 99  | 328 | 214 | 229 | 96  | 325 | 211 | 229 |
| 496 | 113 | 233 | 173 | 120 | 114 | 234 | 174 | 120 | 111 | 231 | 171 | 120 |
| 497 | 173 | 255 | 214 | 82  | 174 | 256 | 215 | 82  | 171 | 253 | 212 | 82  |
| 498 | 94  | 253 | 174 | 159 | 95  | 254 | 175 | 159 | 92  | 251 | 172 | 159 |
| 499 | 102 | 332 | 217 | 230 | 103 | 333 | 218 | 230 | 100 | 330 | 215 | 230 |
| 500 | 106 | 332 | 219 | 226 | 107 | 333 | 220 | 226 | 104 | 330 | 217 | 226 |

| Landsat merged collection |     |     |     |     | <i>r Greenbrown</i> |     |     |     | MODIS |     |     |     |
|---------------------------|-----|-----|-----|-----|---------------------|-----|-----|-----|-------|-----|-----|-----|
| ID                        | SOS | EOS | POS | LOS | SOS                 | EOS | POS | LOS | SOS   | EOS | POS | LOS |
| 1                         | 96  | 272 | 184 | 176 | 97                  | 274 | 186 | 177 | 96    | 276 | 186 | 180 |
| 2                         | 128 | 272 | 200 | 144 | 127                 | 272 | 200 | 145 | 129   | 275 | 202 | 146 |
| 3                         | 143 | 291 | 217 | 148 | 146                 | 289 | 218 | 143 | 136   | 287 | 212 | 151 |
| 4                         | 98  | 327 | 213 | 229 | 98                  | 328 | 213 | 230 | 88    | 333 | 211 | 245 |
| 5                         | 98  | 330 | 214 | 232 | 99                  | 330 | 215 | 231 | 96    | 335 | 216 | 239 |
| 6                         | 132 | 326 | 229 | 194 | 132                 | 327 | 230 | 195 | 128   | 329 | 229 | 201 |
| 7                         | 95  | 325 | 210 | 230 | 99                  | 324 | 212 | 225 | 93    | 333 | 213 | 240 |
| 8                         | 155 | 263 | 209 | 108 | 156                 | 263 | 210 | 107 | 155   | 267 | 211 | 112 |
| 9                         | 130 | 326 | 228 | 196 | 130                 | 326 | 228 | 196 | 128   | 333 | 231 | 205 |
| 10                        | 95  | 325 | 210 | 230 | 95                  | 326 | 211 | 231 | 95    | 327 | 211 | 232 |
| 11                        | 140 | 285 | 213 | 145 | 140                 | 285 | 213 | 145 | 138   | 288 | 213 | 150 |
| 12                        | 121 | 331 | 226 | 210 | 119                 | 334 | 227 | 215 | 121   | 331 | 226 | 210 |
| 13                        | 97  | 327 | 212 | 230 | 97                  | 327 | 212 | 230 | 93    | 332 | 213 | 239 |
| 14                        | 144 | 191 | 168 | 47  | 145                 | 191 | 168 | 46  | 141   | 192 | 167 | 51  |
| 15                        | 99  | 327 | 213 | 228 | 99                  | 327 | 213 | 228 | 93    | 329 | 211 | 236 |
| 16                        | 178 | 231 | 205 | 53  | 178                 | 232 | 205 | 54  | 176   | 236 | 206 | 60  |
| 17                        | 130 | 268 | 199 | 138 | 130                 | 268 | 199 | 138 | 129   | 274 | 202 | 145 |
| 18                        | 119 | 324 | 222 | 205 | 119                 | 324 | 222 | 205 | 121   | 333 | 227 | 212 |
| 19                        | 126 | 272 | 199 | 146 | 126                 | 272 | 199 | 146 | 125   | 274 | 200 | 149 |
| 20                        | 97  | 272 | 185 | 175 | 97                  | 272 | 185 | 175 | 95    | 277 | 186 | 182 |
| 21                        | 138 | 321 | 230 | 183 | 139                 | 321 | 230 | 182 | 138   | 323 | 231 | 185 |
| 22                        | 135 | 309 | 222 | 174 | 135                 | 310 | 223 | 175 | 138   | 314 | 226 | 176 |
| 23                        | 153 | 272 | 213 | 119 | 152                 | 273 | 213 | 121 | 150   | 273 | 212 | 123 |
| 24                        | 168 | 312 | 240 | 144 | 169                 | 313 | 241 | 144 | 159   | 314 | 237 | 155 |
| 25                        | 142 | 280 | 211 | 138 | 142                 | 280 | 211 | 138 | 134   | 287 | 211 | 153 |
| 26                        | 175 | 272 | 224 | 97  | 176                 | 273 | 225 | 97  | 177   | 276 | 227 | 99  |
| 27                        | 115 | 332 | 224 | 217 | 114                 | 331 | 223 | 217 | 117   | 336 | 227 | 219 |
| 28                        | 124 | 269 | 197 | 145 | 124                 | 269 | 197 | 145 | 126   | 276 | 201 | 150 |
| 29                        | 95  | 325 | 210 | 230 | 95                  | 325 | 210 | 230 | 97    | 331 | 214 | 234 |
| 30                        | 112 | 326 | 219 | 214 | 111                 | 325 | 218 | 214 | 116   | 330 | 223 | 214 |
| 31                        | 104 | 330 | 217 | 226 | 104                 | 330 | 217 | 226 | 109   | 334 | 222 | 225 |
| 32                        | 133 | 274 | 204 | 141 | 133                 | 274 | 204 | 141 | 130   | 274 | 202 | 144 |
| 33                        | 160 | 268 | 214 | 108 | 160                 | 268 | 214 | 108 | 162   | 272 | 217 | 110 |
| 34                        | 103 | 277 | 190 | 174 | 102                 | 276 | 189 | 174 | 94    | 268 | 181 | 174 |
| 35                        | 100 | 334 | 217 | 234 | 99                  | 333 | 216 | 234 | 99    | 333 | 216 | 234 |
| 36                        | 147 | 303 | 225 | 156 | 146                 | 302 | 224 | 156 | 150   | 300 | 225 | 150 |
| 37                        | 95  | 331 | 213 | 236 | 94                  | 330 | 212 | 236 | 94    | 333 | 214 | 239 |
| 38                        | 95  | 276 | 186 | 181 | 94                  | 275 | 185 | 181 | 98    | 273 | 186 | 175 |
| 39                        | 121 | 335 | 228 | 214 | 120                 | 334 | 227 | 214 | 122   | 339 | 231 | 217 |
| 40                        | 93  | 336 | 215 | 243 | 92                  | 335 | 214 | 243 | 100   | 339 | 220 | 239 |
| 41                        | 93  | 334 | 214 | 241 | 92                  | 333 | 213 | 241 | 101   | 340 | 221 | 239 |
| 42                        | 92  | 335 | 214 | 243 | 91                  | 334 | 213 | 243 | 101   | 340 | 221 | 239 |
| 43                        | 112 | 332 | 222 | 220 | 111                 | 331 | 221 | 220 | 122   | 336 | 229 | 214 |

|    |     |     |     |     |     |     |     |     |     |     |     |     |
|----|-----|-----|-----|-----|-----|-----|-----|-----|-----|-----|-----|-----|
| 44 | 90  | 330 | 210 | 240 | 89  | 329 | 209 | 240 | 96  | 328 | 212 | 232 |
| 45 | 119 | 321 | 220 | 202 | 118 | 320 | 219 | 202 | 128 | 321 | 225 | 193 |
| 46 | 121 | 320 | 221 | 199 | 120 | 319 | 220 | 199 | 124 | 317 | 221 | 193 |
| 47 | 115 | 325 | 220 | 210 | 114 | 324 | 219 | 210 | 119 | 322 | 221 | 203 |
| 48 | 91  | 274 | 183 | 183 | 90  | 273 | 182 | 183 | 92  | 271 | 182 | 179 |
| 49 | 92  | 329 | 211 | 237 | 92  | 329 | 211 | 237 | 92  | 326 | 209 | 234 |
| 50 | 121 | 272 | 197 | 151 | 121 | 272 | 197 | 151 | 120 | 271 | 196 | 151 |
| 51 | 90  | 272 | 181 | 182 | 90  | 272 | 181 | 182 | 92  | 271 | 182 | 179 |
| 52 | 167 | 246 | 207 | 79  | 168 | 247 | 208 | 79  | 167 | 245 | 206 | 78  |
| 53 | 145 | 295 | 220 | 150 | 146 | 296 | 221 | 150 | 144 | 297 | 221 | 153 |
| 54 | 98  | 330 | 214 | 232 | 99  | 331 | 215 | 232 | 100 | 331 | 216 | 231 |
| 55 | 127 | 299 | 213 | 172 | 128 | 300 | 214 | 172 | 130 | 299 | 215 | 169 |
| 56 | 88  | 271 | 180 | 183 | 89  | 272 | 181 | 183 | 92  | 271 | 182 | 179 |
| 57 | 111 | 328 | 220 | 217 | 112 | 329 | 221 | 217 | 110 | 327 | 219 | 217 |
| 58 | 173 | 298 | 236 | 125 | 174 | 299 | 237 | 125 | 172 | 297 | 235 | 125 |
| 59 | 108 | 272 | 190 | 164 | 109 | 273 | 191 | 164 | 107 | 271 | 189 | 164 |
| 60 | 173 | 271 | 222 | 98  | 172 | 270 | 221 | 98  | 172 | 271 | 222 | 99  |
| 61 | 134 | 230 | 182 | 96  | 133 | 229 | 181 | 96  | 133 | 231 | 182 | 98  |
| 62 | 146 | 209 | 178 | 63  | 145 | 208 | 177 | 63  | 145 | 211 | 178 | 66  |
| 63 | 102 | 326 | 214 | 224 | 101 | 325 | 213 | 224 | 101 | 331 | 216 | 230 |
| 64 | 104 | 327 | 216 | 223 | 105 | 328 | 217 | 223 | 103 | 330 | 217 | 227 |
| 65 | 146 | 267 | 207 | 121 | 147 | 268 | 208 | 121 | 145 | 271 | 208 | 126 |
| 66 | 101 | 329 | 215 | 228 | 102 | 330 | 216 | 228 | 103 | 330 | 217 | 227 |
| 67 | 130 | 271 | 201 | 141 | 131 | 272 | 202 | 141 | 131 | 271 | 201 | 140 |
| 68 | 92  | 316 | 204 | 224 | 93  | 315 | 204 | 222 | 92  | 315 | 204 | 223 |
| 69 | 98  | 325 | 212 | 227 | 99  | 324 | 212 | 225 | 98  | 327 | 213 | 229 |
| 70 | 107 | 328 | 218 | 221 | 108 | 327 | 218 | 219 | 106 | 328 | 217 | 222 |
| 71 | 93  | 327 | 210 | 234 | 94  | 326 | 210 | 232 | 92  | 326 | 209 | 234 |
| 72 | 120 | 324 | 222 | 204 | 121 | 325 | 223 | 204 | 119 | 326 | 223 | 207 |
| 73 | 110 | 324 | 217 | 214 | 111 | 325 | 218 | 214 | 110 | 327 | 219 | 217 |
| 74 | 171 | 293 | 232 | 122 | 172 | 294 | 233 | 122 | 172 | 297 | 235 | 125 |
| 75 | 90  | 192 | 141 | 102 | 90  | 192 | 141 | 102 | 92  | 191 | 142 | 99  |
| 76 | 96  | 319 | 208 | 223 | 96  | 319 | 208 | 223 | 101 | 318 | 210 | 217 |
| 77 | 136 | 267 | 202 | 131 | 136 | 267 | 202 | 131 | 139 | 266 | 203 | 127 |
| 78 | 88  | 332 | 210 | 244 | 88  | 332 | 210 | 244 | 92  | 331 | 212 | 239 |
| 79 | 163 | 301 | 232 | 138 | 163 | 301 | 232 | 138 | 164 | 300 | 232 | 136 |
| 80 | 92  | 272 | 182 | 180 | 92  | 272 | 182 | 180 | 92  | 271 | 182 | 179 |
| 81 | 106 | 259 | 183 | 153 | 105 | 258 | 182 | 153 | 105 | 258 | 182 | 153 |
| 82 | 137 | 267 | 202 | 130 | 136 | 266 | 201 | 130 | 139 | 266 | 203 | 127 |
| 83 | 134 | 295 | 215 | 161 | 133 | 294 | 214 | 161 | 134 | 294 | 214 | 160 |
| 84 | 134 | 269 | 202 | 135 | 135 | 270 | 203 | 135 | 133 | 271 | 202 | 138 |
| 85 | 122 | 294 | 208 | 172 | 123 | 295 | 209 | 172 | 124 | 295 | 210 | 171 |
| 86 | 100 | 327 | 214 | 227 | 101 | 328 | 215 | 227 | 103 | 327 | 215 | 224 |
| 87 | 88  | 331 | 210 | 243 | 89  | 332 | 211 | 243 | 92  | 331 | 212 | 239 |
| 88 | 102 | 272 | 187 | 170 | 103 | 271 | 187 | 168 | 101 | 271 | 186 | 170 |
| 89 | 163 | 215 | 189 | 52  | 164 | 214 | 189 | 50  | 162 | 214 | 188 | 52  |
| 90 | 93  | 315 | 204 | 222 | 93  | 315 | 204 | 222 | 92  | 314 | 203 | 222 |
| 91 | 114 | 231 | 173 | 117 | 114 | 231 | 173 | 117 | 113 | 231 | 172 | 118 |
| 92 | 93  | 270 | 182 | 177 | 93  | 270 | 182 | 177 | 92  | 271 | 182 | 179 |
| 93 | 115 | 329 | 222 | 214 | 115 | 329 | 222 | 214 | 114 | 331 | 223 | 217 |
| 94 | 96  | 266 | 181 | 170 | 96  | 266 | 181 | 170 | 95  | 271 | 183 | 176 |
| 95 | 93  | 268 | 181 | 175 | 94  | 269 | 182 | 175 | 92  | 271 | 182 | 179 |
| 96 | 93  | 267 | 180 | 174 | 94  | 268 | 181 | 174 | 92  | 271 | 182 | 179 |
| 97 | 100 | 250 | 175 | 150 | 101 | 251 | 176 | 150 | 102 | 251 | 177 | 149 |

|     |     |     |     |     |     |     |     |     |     |     |     |     |
|-----|-----|-----|-----|-----|-----|-----|-----|-----|-----|-----|-----|-----|
| 98  | 146 | 259 | 203 | 113 | 147 | 260 | 204 | 113 | 147 | 259 | 203 | 112 |
| 99  | 92  | 331 | 212 | 239 | 93  | 332 | 213 | 239 | 92  | 330 | 211 | 238 |
| 100 | 101 | 269 | 185 | 168 | 102 | 270 | 186 | 168 | 101 | 271 | 186 | 170 |
| 101 | 168 | 248 | 208 | 80  | 169 | 249 | 209 | 80  | 167 | 248 | 208 | 81  |
| 102 | 104 | 275 | 190 | 171 | 105 | 276 | 191 | 171 | 103 | 271 | 187 | 168 |
| 103 | 93  | 335 | 214 | 242 | 92  | 336 | 214 | 244 | 92  | 331 | 212 | 239 |
| 104 | 119 | 314 | 217 | 195 | 118 | 315 | 217 | 197 | 119 | 309 | 214 | 190 |
| 105 | 103 | 333 | 218 | 230 | 102 | 334 | 218 | 232 | 104 | 327 | 216 | 223 |
| 106 | 136 | 274 | 205 | 138 | 135 | 275 | 205 | 140 | 138 | 268 | 203 | 130 |
| 107 | 119 | 337 | 228 | 218 | 118 | 338 | 228 | 220 | 124 | 330 | 227 | 206 |
| 108 | 132 | 274 | 203 | 142 | 131 | 275 | 203 | 144 | 135 | 271 | 203 | 136 |
| 109 | 102 | 326 | 214 | 224 | 103 | 327 | 215 | 224 | 106 | 323 | 215 | 217 |
| 110 | 159 | 260 | 210 | 101 | 160 | 261 | 211 | 101 | 160 | 257 | 209 | 97  |
| 111 | 132 | 290 | 211 | 158 | 133 | 291 | 212 | 158 | 132 | 287 | 210 | 155 |
| 112 | 130 | 310 | 220 | 180 | 131 | 311 | 221 | 180 | 129 | 307 | 218 | 178 |
| 113 | 90  | 331 | 211 | 241 | 91  | 330 | 211 | 239 | 92  | 328 | 210 | 236 |
| 114 | 100 | 276 | 188 | 176 | 101 | 275 | 188 | 174 | 100 | 271 | 186 | 171 |
| 115 | 119 | 277 | 198 | 158 | 120 | 276 | 198 | 156 | 118 | 271 | 195 | 153 |
| 116 | 132 | 333 | 233 | 201 | 133 | 334 | 234 | 201 | 134 | 326 | 230 | 192 |
| 117 | 137 | 247 | 192 | 110 | 138 | 248 | 193 | 110 | 140 | 242 | 191 | 102 |
| 118 | 138 | 285 | 212 | 147 | 138 | 285 | 212 | 147 | 142 | 281 | 212 | 139 |
| 119 | 140 | 303 | 222 | 163 | 140 | 303 | 222 | 163 | 139 | 298 | 219 | 159 |
| 120 | 125 | 271 | 198 | 146 | 125 | 271 | 198 | 146 | 124 | 267 | 196 | 143 |
| 121 | 121 | 336 | 229 | 215 | 121 | 336 | 229 | 215 | 120 | 331 | 226 | 211 |
| 122 | 178 | 244 | 211 | 66  | 178 | 244 | 211 | 66  | 177 | 241 | 209 | 64  |
| 123 | 93  | 275 | 184 | 182 | 93  | 275 | 184 | 182 | 92  | 271 | 182 | 179 |
| 124 | 140 | 303 | 222 | 163 | 140 | 303 | 222 | 163 | 139 | 298 | 219 | 159 |
| 125 | 111 | 334 | 223 | 223 | 111 | 334 | 223 | 223 | 110 | 328 | 219 | 218 |
| 126 | 119 | 275 | 197 | 156 | 119 | 275 | 197 | 156 | 118 | 271 | 195 | 153 |
| 127 | 250 | 305 | 278 | 55  | 250 | 305 | 278 | 55  | 249 | 302 | 276 | 53  |
| 128 | 110 | 334 | 222 | 224 | 110 | 334 | 222 | 224 | 112 | 331 | 222 | 219 |
| 129 | 122 | 331 | 227 | 209 | 122 | 331 | 227 | 209 | 123 | 328 | 226 | 205 |
| 130 | 98  | 332 | 215 | 234 | 97  | 337 | 217 | 240 | 98  | 329 | 214 | 231 |
| 131 | 98  | 329 | 214 | 231 | 97  | 333 | 215 | 236 | 98  | 329 | 214 | 231 |
| 132 | 113 | 308 | 211 | 195 | 112 | 311 | 212 | 199 | 109 | 304 | 207 | 195 |
| 133 | 96  | 335 | 216 | 239 | 96  | 335 | 216 | 239 | 92  | 331 | 212 | 239 |
| 134 | 128 | 333 | 231 | 205 | 123 | 337 | 230 | 214 | 123 | 328 | 226 | 205 |
| 135 | 100 | 332 | 216 | 232 | 100 | 332 | 216 | 232 | 94  | 326 | 210 | 232 |
| 136 | 113 | 323 | 218 | 210 | 113 | 323 | 218 | 210 | 107 | 317 | 212 | 210 |
| 137 | 138 | 337 | 238 | 199 | 138 | 337 | 238 | 199 | 131 | 330 | 231 | 199 |
| 138 | 99  | 331 | 215 | 232 | 99  | 331 | 215 | 232 | 96  | 328 | 212 | 232 |
| 139 | 106 | 330 | 218 | 224 | 106 | 330 | 218 | 224 | 103 | 327 | 215 | 224 |
| 140 | 118 | 331 | 225 | 213 | 118 | 331 | 225 | 213 | 115 | 328 | 222 | 213 |
| 141 | 155 | 254 | 205 | 99  | 155 | 254 | 205 | 99  | 152 | 251 | 202 | 99  |
| 142 | 115 | 288 | 202 | 173 | 115 | 288 | 202 | 173 | 112 | 285 | 199 | 173 |
| 143 | 125 | 331 | 228 | 206 | 125 | 331 | 228 | 206 | 122 | 328 | 225 | 206 |
| 144 | 111 | 336 | 224 | 225 | 112 | 338 | 225 | 226 | 106 | 331 | 219 | 225 |
| 145 | 132 | 277 | 205 | 145 | 133 | 277 | 205 | 144 | 126 | 271 | 199 | 145 |
| 146 | 125 | 278 | 202 | 153 | 128 | 280 | 204 | 152 | 118 | 271 | 195 | 153 |
| 147 | 167 | 279 | 223 | 112 | 167 | 280 | 224 | 113 | 162 | 274 | 218 | 112 |
| 148 | 133 | 235 | 184 | 102 | 134 | 235 | 185 | 101 | 129 | 231 | 180 | 102 |
| 149 | 117 | 276 | 197 | 159 | 117 | 277 | 197 | 160 | 112 | 271 | 192 | 159 |
| 150 | 116 | 332 | 224 | 216 | 120 | 333 | 227 | 213 | 112 | 328 | 220 | 216 |
| 151 | 147 | 263 | 205 | 116 | 148 | 263 | 206 | 115 | 142 | 258 | 200 | 116 |



|     |     |     |     |     |     |     |     |     |     |     |     |     |
|-----|-----|-----|-----|-----|-----|-----|-----|-----|-----|-----|-----|-----|
| 152 | 136 | 334 | 235 | 198 | 136 | 334 | 235 | 198 | 133 | 331 | 232 | 198 |
| 153 | 136 | 275 | 206 | 139 | 136 | 276 | 206 | 140 | 132 | 271 | 202 | 139 |
| 154 | 97  | 256 | 177 | 159 | 97  | 256 | 177 | 159 | 92  | 251 | 172 | 159 |
| 155 | 98  | 315 | 207 | 217 | 98  | 315 | 207 | 217 | 92  | 309 | 201 | 217 |
| 156 | 128 | 332 | 230 | 204 | 128 | 332 | 230 | 204 | 124 | 328 | 226 | 204 |
| 157 | 162 | 282 | 222 | 120 | 163 | 282 | 223 | 119 | 159 | 279 | 219 | 120 |
| 158 | 165 | 221 | 193 | 56  | 165 | 221 | 193 | 56  | 162 | 218 | 190 | 56  |
| 159 | 120 | 324 | 222 | 204 | 120 | 325 | 223 | 205 | 117 | 321 | 219 | 204 |
| 160 | 95  | 254 | 175 | 159 | 95  | 254 | 175 | 159 | 94  | 253 | 174 | 159 |
| 161 | 112 | 334 | 223 | 222 | 112 | 334 | 223 | 222 | 116 | 335 | 226 | 219 |
| 162 | 117 | 309 | 213 | 192 | 117 | 309 | 213 | 192 | 118 | 309 | 214 | 191 |
| 163 | 120 | 321 | 221 | 201 | 120 | 321 | 221 | 201 | 114 | 313 | 214 | 199 |
| 164 | 129 | 300 | 215 | 171 | 130 | 300 | 215 | 170 | 120 | 300 | 210 | 180 |
| 165 | 115 | 277 | 196 | 162 | 115 | 278 | 197 | 163 | 113 | 275 | 194 | 162 |
| 166 | 149 | 278 | 214 | 129 | 150 | 279 | 215 | 129 | 146 | 272 | 209 | 126 |
| 167 | 131 | 306 | 219 | 175 | 132 | 307 | 220 | 175 | 125 | 306 | 216 | 181 |
| 168 | 119 | 328 | 224 | 209 | 119 | 328 | 224 | 209 | 119 | 326 | 223 | 207 |
| 169 | 112 | 274 | 193 | 162 | 113 | 275 | 194 | 162 | 110 | 274 | 192 | 164 |
| 170 | 170 | 227 | 199 | 57  | 170 | 227 | 199 | 57  | 170 | 225 | 198 | 55  |
| 171 | 146 | 274 | 210 | 128 | 146 | 274 | 210 | 128 | 144 | 274 | 209 | 130 |
| 172 | 137 | 294 | 216 | 157 | 137 | 294 | 216 | 157 | 137 | 292 | 215 | 155 |
| 173 | 118 | 328 | 223 | 210 | 118 | 328 | 223 | 210 | 116 | 326 | 221 | 210 |
| 174 | 130 | 307 | 219 | 177 | 130 | 307 | 219 | 177 | 128 | 302 | 215 | 174 |
| 175 | 98  | 278 | 188 | 180 | 98  | 278 | 188 | 180 | 93  | 274 | 184 | 181 |
| 176 | 122 | 328 | 225 | 206 | 122 | 328 | 225 | 206 | 118 | 326 | 222 | 208 |
| 177 | 124 | 327 | 226 | 203 | 124 | 327 | 226 | 203 | 122 | 326 | 224 | 204 |
| 178 | 97  | 276 | 187 | 179 | 97  | 276 | 187 | 179 | 100 | 276 | 188 | 176 |
| 179 | 127 | 309 | 218 | 182 | 127 | 309 | 218 | 182 | 125 | 308 | 217 | 183 |
| 180 | 123 | 319 | 221 | 196 | 123 | 319 | 221 | 196 | 122 | 320 | 221 | 198 |
| 181 | 129 | 274 | 202 | 145 | 129 | 274 | 202 | 145 | 127 | 274 | 201 | 147 |
| 182 | 95  | 334 | 215 | 239 | 95  | 334 | 215 | 239 | 99  | 336 | 218 | 237 |
| 183 | 156 | 236 | 196 | 80  | 156 | 236 | 196 | 80  | 154 | 233 | 194 | 79  |
| 184 | 106 | 277 | 192 | 171 | 105 | 279 | 192 | 174 | 98  | 274 | 186 | 176 |
| 185 | 110 | 328 | 219 | 218 | 109 | 328 | 219 | 219 | 100 | 332 | 216 | 232 |
| 186 | 122 | 331 | 227 | 209 | 125 | 329 | 227 | 204 | 123 | 333 | 228 | 210 |
| 187 | 151 | 249 | 200 | 98  | 151 | 250 | 201 | 99  | 153 | 251 | 202 | 98  |
| 188 | 136 | 274 | 205 | 138 | 137 | 274 | 206 | 137 | 138 | 276 | 207 | 138 |
| 189 | 110 | 330 | 220 | 220 | 110 | 331 | 221 | 221 | 112 | 332 | 222 | 220 |
| 190 | 117 | 334 | 226 | 217 | 121 | 328 | 225 | 207 | 118 | 334 | 226 | 216 |
| 191 | 96  | 282 | 189 | 186 | 97  | 282 | 190 | 185 | 96  | 282 | 189 | 186 |
| 192 | 115 | 276 | 196 | 161 | 115 | 276 | 196 | 161 | 114 | 274 | 194 | 160 |
| 193 | 187 | 246 | 217 | 59  | 187 | 247 | 217 | 60  | 191 | 249 | 220 | 58  |
| 194 | 159 | 263 | 211 | 104 | 159 | 263 | 211 | 104 | 147 | 254 | 201 | 107 |
| 195 | 98  | 278 | 188 | 180 | 98  | 278 | 188 | 180 | 94  | 277 | 186 | 183 |
| 196 | 126 | 334 | 230 | 208 | 126 | 334 | 230 | 208 | 125 | 333 | 229 | 208 |
| 197 | 143 | 272 | 208 | 129 | 144 | 272 | 208 | 128 | 142 | 275 | 209 | 133 |
| 198 | 127 | 315 | 221 | 188 | 127 | 314 | 221 | 187 | 130 | 314 | 222 | 184 |
| 199 | 121 | 307 | 214 | 186 | 121 | 308 | 215 | 187 | 120 | 312 | 216 | 192 |
| 200 | 150 | 287 | 219 | 137 | 150 | 287 | 219 | 137 | 155 | 292 | 224 | 137 |
| 201 | 127 | 289 | 208 | 162 | 127 | 289 | 208 | 162 | 133 | 295 | 214 | 162 |
| 202 | 95  | 276 | 186 | 181 | 95  | 276 | 186 | 181 | 101 | 280 | 191 | 179 |
| 203 | 172 | 240 | 206 | 68  | 172 | 240 | 206 | 68  | 176 | 243 | 210 | 67  |
| 204 | 166 | 257 | 212 | 91  | 167 | 257 | 212 | 90  | 164 | 254 | 209 | 90  |
| 205 | 104 | 276 | 190 | 172 | 104 | 277 | 191 | 173 | 101 | 275 | 188 | 174 |

|     |     |     |     |     |     |     |     |     |     |     |     |     |
|-----|-----|-----|-----|-----|-----|-----|-----|-----|-----|-----|-----|-----|
| 206 | 167 | 280 | 224 | 113 | 168 | 281 | 225 | 113 | 162 | 276 | 219 | 114 |
| 207 | 136 | 275 | 206 | 139 | 137 | 276 | 207 | 139 | 132 | 270 | 201 | 138 |
| 208 | 156 | 304 | 230 | 148 | 156 | 304 | 230 | 148 | 151 | 300 | 226 | 149 |
| 209 | 96  | 276 | 186 | 180 | 97  | 277 | 187 | 180 | 92  | 271 | 182 | 179 |
| 210 | 157 | 274 | 216 | 117 | 157 | 274 | 216 | 117 | 152 | 271 | 212 | 119 |
| 211 | 95  | 333 | 214 | 238 | 95  | 333 | 214 | 238 | 92  | 329 | 211 | 237 |
| 212 | 116 | 276 | 196 | 160 | 116 | 276 | 196 | 160 | 112 | 271 | 192 | 159 |
| 213 | 142 | 271 | 207 | 129 | 142 | 271 | 207 | 129 | 137 | 265 | 201 | 128 |
| 214 | 98  | 275 | 187 | 177 | 98  | 275 | 187 | 177 | 92  | 271 | 182 | 179 |
| 215 | 138 | 325 | 232 | 187 | 138 | 325 | 232 | 187 | 134 | 322 | 228 | 188 |
| 216 | 115 | 274 | 195 | 159 | 115 | 274 | 195 | 159 | 114 | 273 | 194 | 159 |
| 217 | 95  | 334 | 215 | 239 | 96  | 336 | 216 | 240 | 94  | 333 | 214 | 239 |
| 218 | 95  | 334 | 215 | 239 | 96  | 334 | 215 | 238 | 96  | 336 | 216 | 240 |
| 219 | 155 | 332 | 244 | 177 | 158 | 334 | 246 | 176 | 157 | 335 | 246 | 178 |
| 220 | 104 | 327 | 216 | 223 | 104 | 328 | 216 | 224 | 98  | 323 | 211 | 225 |
| 221 | 96  | 332 | 214 | 236 | 97  | 332 | 215 | 235 | 88  | 337 | 213 | 249 |
| 222 | 97  | 327 | 212 | 230 | 97  | 328 | 213 | 231 | 96  | 333 | 215 | 237 |
| 223 | 98  | 270 | 184 | 172 | 102 | 271 | 187 | 169 | 95  | 272 | 184 | 177 |
| 224 | 118 | 271 | 195 | 153 | 119 | 271 | 195 | 152 | 113 | 274 | 194 | 161 |
| 225 | 141 | 305 | 223 | 164 | 141 | 305 | 223 | 164 | 137 | 306 | 222 | 169 |
| 226 | 123 | 305 | 214 | 182 | 123 | 306 | 215 | 183 | 121 | 307 | 214 | 186 |
| 227 | 116 | 327 | 222 | 211 | 116 | 327 | 222 | 211 | 116 | 327 | 222 | 211 |
| 228 | 124 | 332 | 228 | 208 | 124 | 332 | 228 | 208 | 122 | 334 | 228 | 212 |
| 229 | 95  | 331 | 213 | 236 | 95  | 331 | 213 | 236 | 95  | 332 | 214 | 237 |
| 230 | 120 | 210 | 165 | 90  | 121 | 210 | 166 | 89  | 118 | 214 | 166 | 96  |
| 231 | 95  | 329 | 212 | 234 | 95  | 329 | 212 | 234 | 95  | 332 | 214 | 237 |
| 232 | 132 | 307 | 220 | 175 | 132 | 308 | 220 | 176 | 128 | 315 | 222 | 187 |
| 233 | 98  | 268 | 183 | 170 | 98  | 268 | 183 | 170 | 95  | 274 | 185 | 179 |
| 234 | 192 | 187 | 190 | -5  | 192 | 187 | 190 | -5  | 188 | 194 | 191 | 6   |
| 235 | 134 | 270 | 202 | 136 | 134 | 270 | 202 | 136 | 136 | 276 | 206 | 140 |
| 236 | 96  | 331 | 214 | 235 | 96  | 331 | 214 | 235 | 95  | 334 | 215 | 239 |
| 237 | 97  | 272 | 185 | 175 | 98  | 272 | 185 | 174 | 95  | 277 | 186 | 182 |
| 238 | 176 | 269 | 223 | 93  | 176 | 270 | 223 | 94  | 175 | 274 | 225 | 99  |
| 239 | 97  | 331 | 214 | 234 | 98  | 332 | 215 | 234 | 99  | 337 | 218 | 238 |
| 240 | 95  | 272 | 184 | 177 | 96  | 273 | 185 | 177 | 94  | 273 | 184 | 179 |
| 241 | 160 | 275 | 218 | 115 | 160 | 275 | 218 | 115 | 153 | 280 | 217 | 127 |
| 242 | 104 | 268 | 186 | 164 | 105 | 269 | 187 | 164 | 95  | 279 | 187 | 184 |
| 243 | 129 | 309 | 219 | 180 | 130 | 311 | 221 | 181 | 128 | 318 | 223 | 190 |
| 244 | 96  | 332 | 214 | 236 | 97  | 332 | 215 | 235 | 97  | 336 | 217 | 239 |
| 245 | 135 | 270 | 203 | 135 | 138 | 272 | 205 | 134 | 137 | 274 | 206 | 137 |
| 246 | 178 | 241 | 210 | 63  | 178 | 242 | 210 | 64  | 180 | 245 | 213 | 65  |
| 247 | 129 | 272 | 201 | 143 | 130 | 272 | 201 | 142 | 130 | 275 | 203 | 145 |
| 248 | 128 | 272 | 200 | 144 | 128 | 273 | 201 | 145 | 129 | 275 | 202 | 146 |
| 249 | 129 | 332 | 231 | 203 | 133 | 333 | 233 | 200 | 128 | 334 | 231 | 206 |
| 250 | 115 | 326 | 221 | 211 | 116 | 326 | 221 | 210 | 120 | 334 | 227 | 214 |
| 251 | 99  | 328 | 214 | 229 | 99  | 328 | 214 | 229 | 88  | 324 | 206 | 236 |
| 252 | 169 | 252 | 211 | 83  | 169 | 253 | 211 | 84  | 165 | 257 | 211 | 92  |
| 253 | 139 | 269 | 204 | 130 | 139 | 269 | 204 | 130 | 139 | 273 | 206 | 134 |
| 254 | 99  | 329 | 214 | 230 | 99  | 329 | 214 | 230 | 94  | 336 | 215 | 242 |
| 255 | 148 | 264 | 206 | 116 | 148 | 264 | 206 | 116 | 151 | 266 | 209 | 115 |
| 256 | 95  | 327 | 211 | 232 | 96  | 327 | 212 | 231 | 94  | 335 | 215 | 241 |
| 257 | 120 | 272 | 196 | 152 | 120 | 272 | 196 | 152 | 125 | 279 | 202 | 154 |
| 258 | 115 | 302 | 209 | 187 | 115 | 303 | 209 | 188 | 121 | 310 | 216 | 189 |
| 259 | 128 | 292 | 210 | 164 | 128 | 292 | 210 | 164 | 134 | 300 | 217 | 166 |

|     |     |     |     |     |     |     |     |     |     |     |     |     |
|-----|-----|-----|-----|-----|-----|-----|-----|-----|-----|-----|-----|-----|
| 260 | 140 | 278 | 209 | 138 | 140 | 278 | 209 | 138 | 146 | 287 | 217 | 141 |
| 261 | 97  | 324 | 211 | 227 | 97  | 324 | 211 | 227 | 96  | 329 | 213 | 233 |
| 262 | 111 | 269 | 190 | 158 | 111 | 269 | 190 | 158 | 109 | 275 | 192 | 166 |
| 263 | 139 | 266 | 203 | 127 | 140 | 266 | 203 | 126 | 132 | 271 | 202 | 139 |
| 264 | 117 | 327 | 222 | 210 | 117 | 328 | 223 | 211 | 112 | 330 | 221 | 218 |
| 265 | 114 | 316 | 215 | 202 | 113 | 317 | 215 | 204 | 110 | 320 | 215 | 210 |
| 266 | 117 | 330 | 224 | 213 | 116 | 331 | 224 | 215 | 112 | 331 | 222 | 219 |
| 267 | 153 | 263 | 208 | 110 | 153 | 263 | 208 | 110 | 149 | 263 | 206 | 114 |
| 268 | 104 | 272 | 188 | 168 | 105 | 273 | 189 | 168 | 99  | 271 | 185 | 172 |
| 269 | 131 | 329 | 230 | 198 | 132 | 330 | 231 | 198 | 128 | 331 | 230 | 203 |
| 270 | 138 | 215 | 177 | 77  | 139 | 216 | 178 | 77  | 134 | 211 | 173 | 77  |
| 271 | 152 | 295 | 224 | 143 | 151 | 296 | 224 | 145 | 147 | 290 | 219 | 143 |
| 272 | 149 | 274 | 212 | 125 | 148 | 275 | 212 | 127 | 143 | 268 | 206 | 125 |
| 273 | 139 | 275 | 207 | 136 | 138 | 276 | 207 | 138 | 137 | 273 | 205 | 136 |
| 274 | 123 | 321 | 222 | 198 | 122 | 322 | 222 | 200 | 122 | 320 | 221 | 198 |
| 275 | 113 | 323 | 218 | 210 | 112 | 324 | 218 | 212 | 112 | 322 | 217 | 210 |
| 276 | 142 | 266 | 204 | 124 | 141 | 267 | 204 | 126 | 141 | 265 | 203 | 124 |
| 277 | 113 | 323 | 218 | 210 | 112 | 324 | 218 | 212 | 112 | 322 | 217 | 210 |
| 278 | 170 | 269 | 220 | 99  | 169 | 270 | 220 | 101 | 174 | 273 | 224 | 99  |
| 279 | 117 | 315 | 216 | 198 | 116 | 316 | 216 | 200 | 126 | 325 | 226 | 199 |
| 280 | 89  | 321 | 205 | 232 | 88  | 322 | 205 | 234 | 97  | 328 | 213 | 231 |
| 281 | 137 | 279 | 208 | 142 | 138 | 278 | 208 | 140 | 139 | 280 | 210 | 141 |
| 282 | 130 | 279 | 205 | 149 | 131 | 278 | 205 | 147 | 127 | 286 | 207 | 159 |
| 283 | 172 | 251 | 212 | 79  | 173 | 250 | 212 | 77  | 176 | 255 | 216 | 79  |
| 284 | 109 | 328 | 219 | 219 | 110 | 327 | 219 | 217 | 111 | 328 | 220 | 217 |
| 285 | 140 | 299 | 220 | 159 | 141 | 298 | 220 | 157 | 143 | 304 | 224 | 161 |
| 286 | 112 | 331 | 222 | 219 | 113 | 330 | 222 | 217 | 115 | 332 | 224 | 217 |
| 287 | 158 | 273 | 216 | 115 | 159 | 272 | 216 | 113 | 158 | 275 | 217 | 117 |
| 288 | 148 | 283 | 216 | 135 | 149 | 282 | 216 | 133 | 153 | 286 | 220 | 133 |
| 289 | 112 | 326 | 219 | 214 | 113 | 325 | 219 | 212 | 116 | 332 | 224 | 216 |
| 290 | 103 | 327 | 215 | 224 | 104 | 326 | 215 | 222 | 110 | 332 | 221 | 222 |
| 291 | 93  | 272 | 183 | 179 | 94  | 273 | 184 | 179 | 93  | 274 | 184 | 181 |
| 292 | 93  | 331 | 212 | 238 | 94  | 332 | 213 | 238 | 95  | 331 | 213 | 236 |
| 293 | 111 | 321 | 216 | 210 | 110 | 320 | 215 | 210 | 111 | 323 | 217 | 212 |
| 294 | 167 | 240 | 204 | 73  | 166 | 239 | 203 | 73  | 169 | 242 | 206 | 73  |
| 295 | 121 | 316 | 219 | 195 | 120 | 315 | 218 | 195 | 123 | 318 | 221 | 195 |
| 296 | 93  | 272 | 183 | 179 | 92  | 271 | 182 | 179 | 99  | 276 | 188 | 177 |
| 297 | 118 | 272 | 195 | 154 | 117 | 271 | 194 | 154 | 120 | 274 | 197 | 154 |
| 298 | 144 | 318 | 231 | 174 | 143 | 317 | 230 | 174 | 146 | 323 | 235 | 177 |
| 299 | 113 | 332 | 223 | 219 | 112 | 331 | 222 | 219 | 115 | 334 | 225 | 219 |
| 300 | 94  | 325 | 210 | 231 | 93  | 324 | 209 | 231 | 103 | 333 | 218 | 230 |
| 301 | 91  | 325 | 208 | 234 | 90  | 324 | 207 | 234 | 94  | 328 | 211 | 234 |
| 302 | 110 | 320 | 215 | 210 | 111 | 321 | 216 | 210 | 107 | 323 | 215 | 216 |
| 303 | 92  | 326 | 209 | 234 | 93  | 327 | 210 | 234 | 88  | 334 | 211 | 246 |
| 304 | 105 | 332 | 219 | 227 | 106 | 333 | 220 | 227 | 106 | 333 | 220 | 227 |
| 305 | 102 | 335 | 219 | 233 | 103 | 336 | 220 | 233 | 103 | 336 | 220 | 233 |
| 306 | 97  | 335 | 216 | 238 | 98  | 336 | 217 | 238 | 97  | 335 | 216 | 238 |
| 307 | 98  | 277 | 188 | 179 | 99  | 278 | 189 | 179 | 97  | 276 | 187 | 179 |
| 308 | 98  | 277 | 188 | 179 | 99  | 278 | 189 | 179 | 96  | 275 | 186 | 179 |
| 309 | 177 | 336 | 257 | 159 | 176 | 335 | 256 | 159 | 174 | 333 | 254 | 159 |
| 310 | 95  | 330 | 213 | 235 | 94  | 329 | 212 | 235 | 95  | 330 | 213 | 235 |
| 311 | 95  | 274 | 185 | 179 | 94  | 273 | 184 | 179 | 101 | 280 | 191 | 179 |
| 312 | 148 | 245 | 197 | 97  | 147 | 244 | 196 | 97  | 139 | 239 | 189 | 100 |
| 313 | 95  | 274 | 185 | 179 | 94  | 273 | 184 | 179 | 94  | 277 | 186 | 183 |

|     |     |     |     |     |     |     |     |     |     |     |     |     |
|-----|-----|-----|-----|-----|-----|-----|-----|-----|-----|-----|-----|-----|
| 314 | 127 | 332 | 230 | 205 | 126 | 331 | 229 | 205 | 130 | 331 | 231 | 201 |
| 315 | 151 | 257 | 204 | 106 | 150 | 256 | 203 | 106 | 150 | 260 | 205 | 110 |
| 316 | 115 | 325 | 220 | 210 | 114 | 324 | 219 | 210 | 116 | 322 | 219 | 206 |
| 317 | 145 | 284 | 215 | 139 | 144 | 283 | 214 | 139 | 141 | 286 | 214 | 145 |
| 318 | 99  | 332 | 216 | 233 | 100 | 333 | 217 | 233 | 100 | 333 | 217 | 233 |
| 319 | 144 | 236 | 190 | 92  | 145 | 237 | 191 | 92  | 148 | 240 | 194 | 92  |
| 320 | 145 | 262 | 204 | 117 | 146 | 263 | 205 | 117 | 150 | 267 | 209 | 117 |
| 321 | 177 | 276 | 227 | 99  | 178 | 277 | 228 | 99  | 181 | 280 | 231 | 99  |
| 322 | 114 | 324 | 219 | 210 | 115 | 325 | 220 | 210 | 114 | 324 | 219 | 210 |
| 323 | 97  | 276 | 187 | 179 | 98  | 277 | 188 | 179 | 96  | 275 | 186 | 179 |
| 324 | 136 | 334 | 235 | 198 | 137 | 335 | 236 | 198 | 133 | 331 | 232 | 198 |
| 325 | 123 | 332 | 228 | 209 | 124 | 333 | 229 | 209 | 119 | 328 | 224 | 209 |
| 326 | 132 | 301 | 217 | 169 | 133 | 302 | 218 | 169 | 127 | 296 | 212 | 169 |
| 327 | 168 | 192 | 180 | 24  | 169 | 193 | 181 | 24  | 162 | 186 | 174 | 24  |
| 328 | 113 | 275 | 194 | 162 | 114 | 276 | 195 | 162 | 109 | 271 | 190 | 162 |
| 329 | 155 | 194 | 175 | 39  | 156 | 195 | 176 | 39  | 152 | 191 | 172 | 39  |
| 330 | 150 | 297 | 224 | 147 | 151 | 298 | 225 | 147 | 147 | 294 | 221 | 147 |
| 331 | 143 | 301 | 222 | 158 | 144 | 302 | 223 | 158 | 140 | 298 | 219 | 158 |
| 332 | 103 | 274 | 189 | 171 | 104 | 275 | 190 | 171 | 100 | 271 | 186 | 171 |
| 333 | 122 | 311 | 217 | 189 | 123 | 312 | 218 | 189 | 122 | 311 | 217 | 189 |
| 334 | 114 | 324 | 219 | 210 | 115 | 325 | 220 | 210 | 112 | 322 | 217 | 210 |
| 335 | 125 | 320 | 223 | 195 | 126 | 321 | 224 | 195 | 123 | 318 | 221 | 195 |
| 336 | 120 | 316 | 218 | 196 | 121 | 317 | 219 | 196 | 118 | 313 | 216 | 195 |
| 337 | 102 | 277 | 190 | 175 | 103 | 278 | 191 | 175 | 98  | 273 | 186 | 175 |
| 338 | 169 | 250 | 210 | 81  | 170 | 251 | 211 | 81  | 165 | 246 | 206 | 81  |
| 339 | 99  | 278 | 189 | 179 | 100 | 279 | 190 | 179 | 94  | 274 | 184 | 180 |
| 340 | 95  | 332 | 214 | 237 | 96  | 333 | 215 | 237 | 94  | 331 | 213 | 237 |
| 341 | 95  | 331 | 213 | 236 | 96  | 332 | 214 | 236 | 95  | 330 | 213 | 235 |
| 342 | 110 | 328 | 219 | 218 | 111 | 329 | 220 | 218 | 109 | 327 | 218 | 218 |
| 343 | 176 | 249 | 213 | 73  | 177 | 250 | 214 | 73  | 175 | 248 | 212 | 73  |
| 344 | 95  | 333 | 214 | 238 | 96  | 334 | 215 | 238 | 95  | 332 | 214 | 237 |
| 345 | 155 | 329 | 242 | 174 | 156 | 330 | 243 | 174 | 154 | 328 | 241 | 174 |
| 346 | 113 | 276 | 195 | 163 | 114 | 277 | 196 | 163 | 110 | 273 | 192 | 163 |
| 347 | 174 | 272 | 223 | 98  | 175 | 273 | 224 | 98  | 170 | 269 | 220 | 99  |
| 348 | 126 | 320 | 223 | 194 | 127 | 321 | 224 | 194 | 121 | 315 | 218 | 194 |
| 349 | 148 | 306 | 227 | 158 | 149 | 307 | 228 | 158 | 146 | 303 | 225 | 157 |
| 350 | 134 | 275 | 205 | 141 | 135 | 276 | 206 | 141 | 132 | 274 | 203 | 142 |
| 351 | 97  | 236 | 167 | 139 | 98  | 237 | 168 | 139 | 94  | 233 | 164 | 139 |
| 352 | 137 | 275 | 206 | 138 | 138 | 276 | 207 | 138 | 137 | 276 | 207 | 139 |
| 353 | 125 | 276 | 201 | 151 | 126 | 277 | 202 | 151 | 125 | 275 | 200 | 150 |
| 354 | 183 | 205 | 194 | 22  | 184 | 206 | 195 | 22  | 178 | 199 | 189 | 21  |
| 355 | 114 | 324 | 219 | 210 | 115 | 325 | 220 | 210 | 106 | 326 | 216 | 220 |
| 356 | 173 | 253 | 213 | 80  | 174 | 254 | 214 | 80  | 172 | 252 | 212 | 80  |
| 357 | 102 | 327 | 215 | 225 | 103 | 328 | 216 | 225 | 99  | 322 | 211 | 223 |
| 358 | 111 | 335 | 223 | 224 | 112 | 336 | 224 | 224 | 108 | 334 | 221 | 226 |
| 359 | 95  | 332 | 214 | 237 | 96  | 333 | 215 | 237 | 95  | 330 | 213 | 235 |
| 360 | 129 | 299 | 214 | 170 | 130 | 300 | 215 | 170 | 127 | 299 | 213 | 172 |
| 361 | 138 | 254 | 196 | 116 | 138 | 254 | 196 | 116 | 138 | 252 | 195 | 114 |
| 362 | 115 | 316 | 216 | 201 | 115 | 316 | 216 | 201 | 113 | 316 | 215 | 203 |
| 363 | 116 | 335 | 226 | 219 | 116 | 335 | 226 | 219 | 115 | 332 | 224 | 217 |
| 364 | 114 | 324 | 219 | 210 | 114 | 324 | 219 | 210 | 111 | 323 | 217 | 212 |
| 365 | 166 | 253 | 210 | 87  | 166 | 253 | 210 | 87  | 164 | 249 | 207 | 85  |
| 366 | 111 | 334 | 223 | 223 | 111 | 334 | 223 | 223 | 106 | 331 | 219 | 225 |
| 367 | 133 | 337 | 235 | 204 | 133 | 337 | 235 | 204 | 130 | 334 | 232 | 204 |

|     |     |     |     |     |     |     |     |     |     |     |     |     |
|-----|-----|-----|-----|-----|-----|-----|-----|-----|-----|-----|-----|-----|
| 368 | 131 | 337 | 234 | 206 | 131 | 337 | 234 | 206 | 127 | 333 | 230 | 206 |
| 369 | 95  | 274 | 185 | 179 | 95  | 274 | 185 | 179 | 99  | 276 | 188 | 177 |
| 370 | 123 | 274 | 199 | 151 | 123 | 274 | 199 | 151 | 123 | 274 | 199 | 151 |
| 371 | 140 | 219 | 180 | 79  | 141 | 220 | 181 | 79  | 140 | 222 | 181 | 82  |
| 372 | 102 | 333 | 218 | 231 | 103 | 334 | 219 | 231 | 102 | 333 | 218 | 231 |
| 373 | 178 | 249 | 214 | 71  | 179 | 250 | 215 | 71  | 182 | 252 | 217 | 70  |
| 374 | 95  | 311 | 203 | 216 | 96  | 312 | 204 | 216 | 94  | 310 | 202 | 216 |
| 375 | 97  | 336 | 217 | 239 | 98  | 337 | 218 | 239 | 89  | 334 | 212 | 245 |
| 376 | 159 | 250 | 205 | 91  | 160 | 251 | 206 | 91  | 149 | 252 | 201 | 103 |
| 377 | 99  | 334 | 217 | 235 | 100 | 335 | 218 | 235 | 97  | 332 | 215 | 235 |
| 378 | 117 | 329 | 223 | 212 | 118 | 330 | 224 | 212 | 117 | 329 | 223 | 212 |
| 379 | 96  | 328 | 212 | 232 | 97  | 329 | 213 | 232 | 97  | 329 | 213 | 232 |
| 380 | 97  | 334 | 216 | 237 | 98  | 335 | 217 | 237 | 97  | 334 | 216 | 237 |
| 381 | 124 | 275 | 200 | 151 | 125 | 276 | 201 | 151 | 124 | 275 | 200 | 151 |
| 382 | 118 | 334 | 226 | 216 | 119 | 335 | 227 | 216 | 117 | 333 | 225 | 216 |
| 383 | 106 | 254 | 180 | 148 | 107 | 255 | 181 | 148 | 106 | 254 | 180 | 148 |
| 384 | 149 | 283 | 216 | 134 | 150 | 284 | 217 | 134 | 154 | 288 | 221 | 134 |
| 385 | 115 | 325 | 220 | 210 | 116 | 326 | 221 | 210 | 104 | 317 | 211 | 213 |
| 386 | 146 | 297 | 222 | 151 | 147 | 298 | 223 | 151 | 142 | 297 | 220 | 155 |
| 387 | 96  | 275 | 186 | 179 | 97  | 276 | 187 | 179 | 98  | 273 | 186 | 175 |
| 388 | 110 | 271 | 191 | 161 | 111 | 272 | 192 | 161 | 109 | 274 | 192 | 165 |
| 389 | 95  | 274 | 185 | 179 | 96  | 275 | 186 | 179 | 98  | 273 | 186 | 175 |
| 390 | 104 | 334 | 219 | 230 | 105 | 335 | 220 | 230 | 103 | 339 | 221 | 236 |
| 391 | 118 | 274 | 196 | 156 | 119 | 275 | 197 | 156 | 123 | 279 | 201 | 156 |
| 392 | 164 | 321 | 243 | 157 | 165 | 322 | 244 | 157 | 169 | 326 | 248 | 157 |
| 393 | 96  | 323 | 210 | 227 | 97  | 324 | 211 | 227 | 101 | 328 | 215 | 227 |
| 394 | 97  | 276 | 187 | 179 | 98  | 277 | 188 | 179 | 101 | 280 | 191 | 179 |
| 395 | 157 | 254 | 206 | 97  | 158 | 255 | 207 | 97  | 155 | 252 | 204 | 97  |
| 396 | 147 | 260 | 204 | 113 | 148 | 261 | 205 | 113 | 145 | 258 | 202 | 113 |
| 397 | 135 | 327 | 231 | 192 | 136 | 328 | 232 | 192 | 128 | 320 | 224 | 192 |
| 398 | 163 | 320 | 242 | 157 | 162 | 319 | 241 | 157 | 160 | 317 | 239 | 157 |
| 399 | 115 | 334 | 225 | 219 | 114 | 333 | 224 | 219 | 112 | 331 | 222 | 219 |
| 400 | 120 | 274 | 197 | 154 | 119 | 273 | 196 | 154 | 117 | 271 | 194 | 154 |
| 401 | 95  | 274 | 185 | 179 | 94  | 273 | 184 | 179 | 92  | 271 | 182 | 179 |
| 402 | 126 | 300 | 213 | 174 | 125 | 299 | 212 | 174 | 123 | 297 | 210 | 174 |
| 403 | 163 | 320 | 242 | 157 | 162 | 319 | 241 | 157 | 160 | 317 | 239 | 157 |
| 404 | 132 | 336 | 234 | 204 | 131 | 335 | 233 | 204 | 127 | 331 | 229 | 204 |
| 405 | 112 | 337 | 225 | 225 | 111 | 336 | 224 | 225 | 106 | 331 | 219 | 225 |
| 406 | 134 | 338 | 236 | 204 | 133 | 337 | 235 | 204 | 127 | 331 | 229 | 204 |
| 407 | 97  | 333 | 215 | 236 | 96  | 332 | 214 | 236 | 95  | 330 | 213 | 235 |
| 408 | 145 | 258 | 202 | 113 | 144 | 257 | 201 | 113 | 144 | 256 | 200 | 112 |
| 409 | 162 | 304 | 233 | 142 | 161 | 303 | 232 | 142 | 160 | 302 | 231 | 142 |
| 410 | 164 | 321 | 243 | 157 | 163 | 320 | 242 | 157 | 163 | 319 | 241 | 156 |
| 411 | 97  | 334 | 216 | 237 | 96  | 333 | 215 | 237 | 95  | 332 | 214 | 237 |
| 412 | 95  | 332 | 214 | 237 | 94  | 331 | 213 | 237 | 99  | 335 | 217 | 236 |
| 413 | 136 | 275 | 206 | 139 | 135 | 274 | 205 | 139 | 135 | 274 | 205 | 139 |
| 414 | 117 | 336 | 227 | 219 | 116 | 335 | 226 | 219 | 116 | 336 | 226 | 220 |
| 415 | 133 | 217 | 175 | 84  | 132 | 216 | 174 | 84  | 132 | 215 | 174 | 83  |
| 416 | 108 | 307 | 208 | 199 | 109 | 308 | 209 | 199 | 102 | 300 | 201 | 198 |
| 417 | 101 | 334 | 218 | 233 | 102 | 335 | 219 | 233 | 94  | 337 | 216 | 243 |
| 418 | 253 | 282 | 268 | 29  | 254 | 283 | 269 | 29  | 254 | 283 | 269 | 29  |
| 419 | 115 | 254 | 185 | 139 | 116 | 255 | 186 | 139 | 115 | 252 | 184 | 137 |
| 420 | 136 | 274 | 205 | 138 | 137 | 275 | 206 | 138 | 134 | 274 | 204 | 140 |
| 421 | 96  | 323 | 210 | 227 | 97  | 324 | 211 | 227 | 95  | 320 | 208 | 225 |

|     |     |     |     |     |     |     |     |     |     |     |     |     |
|-----|-----|-----|-----|-----|-----|-----|-----|-----|-----|-----|-----|-----|
| 422 | 96  | 335 | 216 | 239 | 97  | 336 | 217 | 239 | 93  | 334 | 214 | 241 |
| 423 | 138 | 276 | 207 | 138 | 139 | 277 | 208 | 138 | 136 | 272 | 204 | 136 |
| 424 | 180 | 213 | 197 | 33  | 181 | 214 | 198 | 33  | 175 | 210 | 193 | 35  |
| 425 | 143 | 282 | 213 | 139 | 144 | 283 | 214 | 139 | 140 | 277 | 209 | 137 |
| 426 | 179 | 286 | 233 | 107 | 180 | 287 | 234 | 107 | 173 | 282 | 228 | 109 |
| 427 | 95  | 274 | 185 | 179 | 96  | 275 | 186 | 179 | 95  | 272 | 184 | 177 |
| 428 | 126 | 329 | 228 | 203 | 127 | 330 | 229 | 203 | 124 | 329 | 227 | 205 |
| 429 | 104 | 274 | 189 | 170 | 105 | 275 | 190 | 170 | 104 | 274 | 189 | 170 |
| 430 | 260 | 334 | 297 | 74  | 261 | 335 | 298 | 74  | 260 | 334 | 297 | 74  |
| 431 | 106 | 326 | 216 | 220 | 107 | 327 | 217 | 220 | 110 | 328 | 219 | 218 |
| 432 | 152 | 254 | 203 | 102 | 153 | 255 | 204 | 102 | 152 | 254 | 203 | 102 |
| 433 | 117 | 335 | 226 | 218 | 118 | 336 | 227 | 218 | 115 | 336 | 226 | 221 |
| 434 | 178 | 285 | 232 | 107 | 179 | 286 | 233 | 107 | 175 | 282 | 229 | 107 |
| 435 | 99  | 278 | 189 | 179 | 100 | 279 | 190 | 179 | 99  | 277 | 188 | 178 |
| 436 | 128 | 331 | 230 | 203 | 129 | 332 | 231 | 203 | 125 | 328 | 227 | 203 |
| 437 | 147 | 237 | 192 | 90  | 148 | 238 | 193 | 90  | 140 | 236 | 188 | 96  |
| 438 | 262 | 336 | 299 | 74  | 263 | 337 | 300 | 74  | 253 | 339 | 296 | 86  |
| 439 | 119 | 323 | 221 | 204 | 120 | 324 | 222 | 204 | 120 | 324 | 222 | 204 |
| 440 | 168 | 246 | 207 | 78  | 169 | 247 | 208 | 78  | 168 | 246 | 207 | 78  |
| 441 | 115 | 320 | 218 | 205 | 116 | 321 | 219 | 205 | 117 | 322 | 220 | 205 |
| 442 | 99  | 275 | 187 | 176 | 100 | 276 | 188 | 176 | 100 | 276 | 188 | 176 |
| 443 | 168 | 246 | 207 | 78  | 169 | 247 | 208 | 78  | 167 | 245 | 206 | 78  |
| 444 | 136 | 337 | 237 | 201 | 137 | 338 | 238 | 201 | 134 | 335 | 235 | 201 |
| 445 | 176 | 327 | 252 | 151 | 177 | 328 | 253 | 151 | 175 | 326 | 251 | 151 |
| 446 | 95  | 332 | 214 | 237 | 96  | 333 | 215 | 237 | 101 | 338 | 220 | 237 |
| 447 | 115 | 334 | 225 | 219 | 116 | 335 | 226 | 219 | 106 | 328 | 217 | 222 |
| 448 | 95  | 328 | 212 | 233 | 96  | 329 | 213 | 233 | 94  | 331 | 213 | 237 |
| 449 | 95  | 334 | 215 | 239 | 96  | 335 | 216 | 239 | 98  | 333 | 216 | 235 |
| 450 | 173 | 324 | 249 | 151 | 174 | 325 | 250 | 151 | 174 | 329 | 252 | 155 |
| 451 | 93  | 332 | 213 | 239 | 94  | 333 | 214 | 239 | 98  | 333 | 216 | 235 |
| 452 | 133 | 305 | 219 | 172 | 134 | 306 | 220 | 172 | 134 | 312 | 223 | 178 |
| 453 | 110 | 329 | 220 | 219 | 111 | 330 | 221 | 219 | 120 | 339 | 230 | 219 |
| 454 | 102 | 301 | 202 | 199 | 103 | 302 | 203 | 199 | 112 | 311 | 212 | 199 |
| 455 | 92  | 328 | 210 | 236 | 93  | 329 | 211 | 236 | 101 | 337 | 219 | 236 |
| 456 | 124 | 251 | 188 | 127 | 125 | 252 | 189 | 127 | 133 | 260 | 197 | 127 |
| 457 | 154 | 291 | 223 | 137 | 155 | 292 | 224 | 137 | 157 | 294 | 226 | 137 |
| 458 | 93  | 330 | 212 | 237 | 94  | 331 | 213 | 237 | 96  | 333 | 215 | 237 |
| 459 | 173 | 252 | 213 | 79  | 174 | 253 | 214 | 79  | 172 | 251 | 212 | 79  |
| 460 | 117 | 325 | 221 | 208 | 118 | 326 | 222 | 208 | 117 | 325 | 221 | 208 |
| 461 | 129 | 297 | 213 | 168 | 130 | 298 | 214 | 168 | 130 | 298 | 214 | 168 |
| 462 | 155 | 269 | 212 | 114 | 156 | 270 | 213 | 114 | 157 | 271 | 214 | 114 |
| 463 | 103 | 266 | 185 | 163 | 104 | 267 | 186 | 163 | 108 | 271 | 190 | 163 |
| 464 | 145 | 268 | 207 | 123 | 145 | 268 | 207 | 123 | 148 | 271 | 210 | 123 |
| 465 | 178 | 237 | 208 | 59  | 178 | 237 | 208 | 59  | 182 | 241 | 212 | 59  |
| 466 | 171 | 250 | 211 | 79  | 171 | 250 | 211 | 79  | 172 | 251 | 212 | 79  |
| 467 | 92  | 331 | 212 | 239 | 92  | 331 | 212 | 239 | 92  | 331 | 212 | 239 |
| 468 | 100 | 263 | 182 | 163 | 100 | 263 | 182 | 163 | 99  | 262 | 181 | 163 |
| 469 | 149 | 235 | 192 | 86  | 149 | 235 | 192 | 86  | 151 | 237 | 194 | 86  |
| 470 | 137 | 268 | 203 | 131 | 137 | 268 | 203 | 131 | 137 | 268 | 203 | 131 |
| 471 | 105 | 272 | 189 | 167 | 105 | 272 | 189 | 167 | 104 | 271 | 188 | 167 |
| 472 | 126 | 286 | 206 | 160 | 126 | 286 | 206 | 160 | 128 | 288 | 208 | 160 |
| 473 | 259 | 328 | 294 | 69  | 259 | 328 | 294 | 69  | 262 | 331 | 297 | 69  |
| 474 | 142 | 215 | 179 | 73  | 142 | 215 | 179 | 73  | 146 | 219 | 183 | 73  |
| 475 | 124 | 302 | 213 | 178 | 124 | 302 | 213 | 178 | 123 | 301 | 212 | 178 |

---

|     |     |     |     |     |     |     |     |     |     |     |     |     |
|-----|-----|-----|-----|-----|-----|-----|-----|-----|-----|-----|-----|-----|
| 476 | 118 | 297 | 208 | 179 | 118 | 297 | 208 | 179 | 117 | 297 | 207 | 180 |
| 477 | 100 | 263 | 182 | 163 | 100 | 263 | 182 | 163 | 99  | 262 | 181 | 163 |
| 478 | 134 | 249 | 192 | 115 | 134 | 249 | 192 | 115 | 133 | 251 | 192 | 118 |
| 479 | 93  | 307 | 200 | 214 | 93  | 307 | 200 | 214 | 92  | 310 | 201 | 218 |
| 480 | 113 | 323 | 218 | 210 | 113 | 323 | 218 | 210 | 112 | 327 | 220 | 215 |
| 481 | 113 | 332 | 223 | 219 | 113 | 332 | 223 | 219 | 112 | 331 | 222 | 219 |
| 482 | 104 | 329 | 217 | 225 | 104 | 329 | 217 | 225 | 103 | 328 | 216 | 225 |
| 483 | 107 | 330 | 219 | 223 | 107 | 330 | 219 | 223 | 106 | 329 | 218 | 223 |
| 484 | 114 | 332 | 223 | 218 | 114 | 332 | 223 | 218 | 116 | 331 | 224 | 215 |
| 485 | 91  | 272 | 182 | 181 | 91  | 272 | 182 | 181 | 92  | 271 | 182 | 179 |
| 486 | 92  | 330 | 211 | 238 | 92  | 330 | 211 | 238 | 92  | 329 | 211 | 237 |
| 487 | 130 | 272 | 201 | 142 | 131 | 273 | 202 | 142 | 130 | 271 | 201 | 141 |
| 488 | 130 | 275 | 203 | 145 | 131 | 276 | 204 | 145 | 129 | 274 | 202 | 145 |
| 489 | 102 | 330 | 216 | 228 | 103 | 331 | 217 | 228 | 101 | 329 | 215 | 228 |
| 490 | 93  | 305 | 199 | 212 | 94  | 306 | 200 | 212 | 92  | 307 | 200 | 215 |
| 491 | 143 | 260 | 202 | 117 | 144 | 261 | 203 | 117 | 143 | 261 | 202 | 118 |
| 492 | 159 | 252 | 206 | 93  | 160 | 253 | 207 | 93  | 160 | 252 | 206 | 92  |
| 493 | 109 | 231 | 170 | 122 | 110 | 232 | 171 | 122 | 111 | 231 | 171 | 120 |
| 494 | 91  | 331 | 211 | 240 | 92  | 332 | 212 | 240 | 96  | 327 | 212 | 231 |
| 495 | 93  | 329 | 211 | 236 | 94  | 330 | 212 | 236 | 96  | 325 | 211 | 229 |
| 496 | 107 | 236 | 172 | 129 | 108 | 237 | 173 | 129 | 111 | 231 | 171 | 120 |
| 497 | 170 | 259 | 215 | 89  | 171 | 260 | 216 | 89  | 171 | 253 | 212 | 82  |
| 498 | 92  | 257 | 175 | 165 | 93  | 258 | 176 | 165 | 92  | 251 | 172 | 159 |
| 499 | 101 | 337 | 219 | 236 | 102 | 338 | 220 | 236 | 100 | 330 | 215 | 230 |
| 500 | 102 | 333 | 218 | 231 | 103 | 334 | 219 | 231 | 104 | 330 | 217 | 226 |
